1 **Full Title:** Cell-nonautonomous local and systemic responses to cell arrest enable long-bone  
2 catch-up growth in developing mice

3 **Short Title:** Long-bone catch-up growth by local and systemic mechanisms

4 **Authors:** Alberto Roselló-Díez<sup>1\*</sup>, Linda Madisen<sup>2</sup>, Sébastien Bastide<sup>1†</sup>, Hongkui Zeng<sup>2</sup> &  
5 Alexandra L. Joyner<sup>1,3\*</sup>.

6

7 **Affiliations**

8 <sup>1</sup> *Developmental Biology Program. Sloan Kettering Institute. New York, NY 10065. USA.*

9 <sup>2</sup> *Allen Institute for Brain Science. Seattle, WA 98109. USA.*

10 <sup>3</sup> *Biochemistry, Cell and Molecular Biology Program, Weill Cornell Graduate School of Medical  
11 Sciences, New York, NY, 10065. USA*

12 †Current address: Dept. of Developmental & Stem Cell Biology. Institut Pasteur, Paris, France.

13 \*Co-corresponding authors

14

15

16 **Abstract**

17 Catch-up growth after insults to growing organs is paramount to achieving robust body  
18 proportions. In fly larvae, local injury is followed by local and systemic compensatory  
19 mechanisms that allow damaged tissues to regain proportions with other tissues. In vertebrates,  
20 local catch-up growth has been described after transient reduction of bone growth, but the  
21 underlying cellular responses are controversial. We developed an approach to study catch-up  
22 growth in foetal mice by inducing mosaic expression of the cell cycle suppressor p21 in the  
23 cartilage cells (chondrocytes) that drive long bone elongation. By specifically targeting the left  
24 hindlimb, the right limb served as an internal control. Strikingly, left-right limb symmetry was  
25 not altered, revealing deployment of compensatory mechanisms. Above a certain threshold of  
26 insult, an orchestrated response was triggered involving local enhancement of bone growth and  
27 systemic growth reduction that ensured body proportions were maintained. The local response  
28 entailed hyper-proliferation of spared left-limb chondrocytes that was associated with reduced  
29 chondrocyte density. The systemic effect involved impaired placental IGF signalling and  
30 function, revealing bone-placenta communication. Thus, vertebrates, much like invertebrates,  
31 can mount coordinated local and systemic responses to developmental insults to ensure normal  
32 body proportions are maintained.

## 33 **Introduction**

34 An important question in biology is how cells integrate intrinsic and extrinsic information such  
35 that their combined behaviours produce higher-order processes and structures, as seen during  
36 organogenesis and tissue repair. In *Drosophila* larvae, injured tissues can undergo compensatory  
37 proliferation[1] as well as secrete an alarm signal that triggers both a systemic developmental delay  
38 and growth reduction[2-5]. Together, these processes allow the damaged tissue(s) to catch-up  
39 with other tissues, but the role of damaged vs. undamaged cells remains controversial[6,7]. In  
40 vertebrates, systemic growth reduction after injury in a non-essential organ has not been  
41 reported. However, systemic catch-up growth has been described after transient impairment of  
42 whole-body growth[8-10], and local growth compensation can occur after unilateral manipulation  
43 of long bones within the limbs[11]. Tight control of inter-limb and limb-body proportions are critical  
44 for efficient locomotion and interaction with the environment, and therefore long bones are an  
45 excellent model for studies of growth regulation. Growth of the initial cartilage templates of long  
46 bones is driven by the growth plates (GPs) at each end, where chondrocytes proliferate, then mature,  
47 become hypertrophic and eventually are replaced by bone-forming cells in a process called  
48 endochondral ossification[12]. It has been proposed that bone catch-up growth is due to a cell-  
49 autonomous delay in the normal developmental decline of chondrocyte proliferation, such that when  
50 the insult is lifted, the formerly arrested chondrocytes retain a higher proliferative potential[9,13]. A  
51 similar mechanism was suggested to apply to other organs as well[14]. However, such a mechanism  
52 does not account for cases in which catch-up growth is faster than expected for the observed  
53 maturation delay[15,16]. Here, we developed new mouse models to transiently decrease long-bone  
54 growth in mice in order to determine the contributions of cell-autonomous and nonautonomous  
55 regulation during catch-up growth.

## 56 **Results and Discussion**

### 57 *Mosaic local proliferation blockade in the left limb cartilage does not lead to a major left-specific* 58 *bone growth reduction*

59 A major roadblock for studies of intra- and inter-organ growth regulation in mouse embryos has  
60 been a lack of models in which growth rate can be altered in a specific cell type within an organ, and  
61 ideally in only one of two paired organs, leaving the unmanipulated organ as an internal control. To  
62 address this deficiency, we devised new mouse models of inducible and transient growth inhibition  
63 in the left limb. We generated an *Igs7<sup>TRE-LtSL-p21/+</sup>* allele, a variant of a double-conditional allele[17],  
64 to achieve doxycycline (Dox)-tuneable misexpression of the cell cycle suppressor *Cdkn1a* (*p21*  
65 hereafter)[18] in the cells where Cre and (r)tTA activity intersect (Fig. 1A-B). Due to a floxed  
66 tdTomato-STOP sequence (LtSL), expression of tdTomato (tdT) takes place in cells expressing  
67 (r)tTA but having no history of Cre activity, whereas *p21* is expressed in the cell population with a  
68 history of Cre and current (r)tTA activity (Fig. 1A). We named the general type of allele  
69 Doxycycline-controlled and Recombinase Activated Gene OverexpressionN (DRAGON). By  
70 combining the *DRAGON-p21* allele with an *asymmetric-Pitx2-enhancer-Cre* line expressing Cre in  
71 the precursors of the left limb mesenchyme[19] (Supplemental Fig. 1A-F) and a *Col2a1-rtTA*  
72 line[20] (Fig. 1B), Dox-dependent ectopic *p21* expression was achieved specifically in non-  
73 hypertrophic chondrocytes of the left limb cartilage elements (Fig. 1C-C'). Consequently, any  
74 growth adjustment detected in the right limb of triple transgenic animals (*Pit-Col-p21*) when  
75 compared to control littermates must be due to activation of a systemic effect.

76 When Dox was administered from embryonic day (E) 12.5 until birth (*ePit-Col-p21* model),  
77 analysis at E14.5-E17.5 revealed the expected cartilage-exclusive expression of tdT, mainly in the  
78 right skeletal elements, and *p21* expression preferentially in the left limb cartilage, albeit in a mosaic

79 fashion (Supplemental Fig. 1G-H, Fig. 1C-F; 36-67% vs. 0.8-23% of chondrocytes were p21<sup>+</sup> in left  
80 vs. right proximal tibia). Since Cre activity and therefore *p21* expression was more widespread in the  
81 left hindlimb than in the left forelimb (Supplemental Fig. 1I-J and [21]), we focused our initial  
82 analysis on the hindlimb. As expected, proliferation was inhibited in p21<sup>+</sup> chondrocytes at E15.5 and  
83 E17.5 (Fig. 1D-E and G). Importantly, misexpression of *p21* in proliferative zone (PZ) chondrocytes  
84 did not induce precocious expression of chondrocyte maturation markers (e.g. *Ihh*, *Col10a1*, *Cdkn1c*)  
85 or cell senescence (monitored by expression of p16) by E17.5, nor did it alter the archetypical  
86 cytoarchitecture of the cartilage[12] or chondrocyte survival at E15.5 or E17.5 (Supplemental Fig.  
87 2A-G). However, the normal expression domains of *Ihh*, *Col10a1* and *Cdkn1c* in (pre)hypertrophic  
88 chondrocytes (which no longer expressed the transgene) appeared slightly fainter in the left cartilage,  
89 suggesting a mild maturation impairment (Supplemental Fig. 2C-E).

90 Strikingly, *ePit-Col-p21* mice at E17.5 or birth (P0) showed no obvious differences in the  
91 left/right ratio of tibia and femur length compared to *Pitx2-Cre; Igs7<sup>TRE-LtSL-p21/+</sup>* control littermates  
92 (*ePit-p21*) (Fig. 1H-I), indicating that compensatory mechanisms had been activated to maintain  
93 body proportions. Hereafter, we refer to this new type of catch-up growth that happens during an on-  
94 going insult as ‘adaptive growth’.

95 *Cell-nonautonomous compensation by spared neighbours in response to mosaic blockade of*  
96 *chondrocyte proliferation*

97 To elucidate the compensatory mechanisms underlying adaptive growth, we first tested for an  
98 organ-intrinsic response, focusing on a change in chondrocyte proliferation. Indeed, the left/right  
99 ratio of EdU incorporation by p21<sup>-</sup> chondrocytes was higher in experimental animals as compared  
100 with controls at E17.5 and P0 but not E15.5 (Fig. 2A and Supplemental Fig. 2H), revealing cell-  
101 nonautonomous compensatory proliferation of p21<sup>-</sup> cells in the presence of p21<sup>+</sup> neighbours. Since

102 p21<sup>-</sup> cells did not differ in size from those of control mice (Supplemental Fig. 2I), the  
103 hyperproliferation of these cells at E17.5 likely contributes to the lack of a left-specific growth  
104 reduction in *ePit-Col-p21* embryos. In fact, overall EdU incorporation in left and right *ePit-Col-p21*  
105 GPs (without distinguishing between p21<sup>+</sup> and p21<sup>-</sup> cells), while tending to be reduced was not  
106 significantly different, indicating that the compensatory proliferation phenomenon is quite effective  
107 (Fig. 2B). Moreover, the proliferative disadvantage of E17.5 p21<sup>+</sup> vs. p21<sup>-</sup> chondrocytes in the left  
108 limb of *ePit-Col-p21* mice resulted in dilution of p21<sup>+</sup> chondrocytes from 45-50% of PZ  
109 chondrocytes at E15.5 and E17.5 to ~20% at P0 (Fig. 2C-D), and this depletion was not due to  
110 inactivation of rtTA activity (Fig. 2D). Our finding that a compensatory response occurs during the  
111 insult and involves cell-nonautonomous mechanisms is distinct from a model that proposes  
112 compensation is cell-autonomous once the insult is lifted[9,11,13], and thus introduces a new  
113 conceptual framework for the interpretation of previous and future results concerning long-bone  
114 growth.

115 *Compensatory proliferation takes place when cell density in the growth plate is lower than normal*

116 To learn whether compensatory proliferation was independent of interactions with other tissues,  
117 we cultured left and right E15.5 *ePit-Col-p21* tibiae (together in the same well) for two days with  
118 Dox, in the absence of soft tissues (Fig. 3A). Notably, EdU incorporation in p21<sup>-</sup> chondrocytes was  
119 significantly higher in the left as compared to the right cultured cartilage (Fig. 3B-C), indicating that  
120 compensatory proliferation is a cartilage-intrinsic phenomenon. We next addressed whether the  
121 amount of p21<sup>+</sup> chondrocytes influences the extent of compensatory proliferation. By using a new  
122 *Col2a1-tTA* line (*Pit-tTA-p21* model), we misexpressed *p21* in fewer left limb chondrocytes (30-40%  
123 at E15.5, 15-35% at E17.5, 10-20% at P0, Supplemental Fig. 3A). Compensatory proliferation was  
124 not triggered (Supplemental Fig. 3B-C), suggesting it requires a minimum insult threshold. Lastly,

125 we calculated the correlation coefficient between the % of p21<sup>+</sup> chondrocytes and the extent of  
126 proliferation in GPs from left and right *ePit-Col-p21* (*in vivo* and *ex vivo*) and *Pit-tTA-p21* tibiae, at  
127 E17.5 (or E15.5+2days *ex vivo*). Segmental linear regression analysis revealed that the extent of EdU  
128 incorporation by p21<sup>-</sup> chondrocytes did not correlate with the proportion of p21<sup>+</sup> neighbours when  
129 this proportion was below 35%, but beyond this threshold, there was linear correlation between both  
130 parameters (Fig. 3D). These results suggest that compensatory proliferation is due to a signal  
131 produced in proportion to the number of arrested chondrocytes, that the signal needs to reach a  
132 certain threshold to be effective, and that it remains active until at least P0 despite the dilution of  
133 p21<sup>+</sup> chondrocytes. Interestingly, we observed a temporal association between the occurrence of  
134 compensatory proliferation in the *ePit-Col-p21* model (i.e. at E17.5 and P0 but not E15.5) and  
135 statistically significant reduction of cell density in the left PZ as compared to the right (Fig. 3E).  
136 Notably, left and right PZ cell densities were not significantly different at any stage in *ePit-p21* mice  
137 (Fig. 3E, n=12). These findings raise the possibility that the signal triggering increased proliferation  
138 is related to the decreased cell density that follows chondrocyte arrest. In fact, we found that at E17.5  
139 there was a threshold value of cell density below which EdU incorporation sharply increased in p21<sup>-</sup>  
140 chondrocytes (Fig. 3F), likely explaining why a certain extent of insult is needed to trigger  
141 compensatory proliferation. Such a mechanism would also ensure compensatory proliferation does  
142 not lead to overgrowth once the threshold cell density is attained.

143 *Mosaic local proliferation blockade in chondrocytes of the left limb results in systemic growth*  
144 *reduction*

145 Since the proliferative capacity of chondrocytes could have an intrinsic limit, we next tested  
146 whether systemic effects contribute to rescuing the induced growth defect. We indeed found that  
147 right bone length and body weight of E17.5 and P0, but not E15.5 *ePit-Col-p21* mice were ~10%

148 lower than those of *ePit-p21* littermates, an effect that required Dox treatment and therefore *p21*  
149 expression (Fig. 4A-C, Supplemental Fig. 4A and not shown). Importantly, there was no leakiness of  
150 the intersectional misexpression strategy (Supplemental Fig. 4B) that could account for the systemic  
151 growth reduction, and misexpression of tdT in all chondrocytes does not cause a systemic growth  
152 reduction (Fig. 4B-C). Our results thus revealed a whole-body response to a local insult in mice,  
153 similar to what has been described in *Drosophila* larvae[2-5]. To characterize the cartilage response,  
154 we performed an RNA-seq experiment to identify differentially expressed genes (DEG) between left  
155 and right *ePit-Col-p21* GPs at E17.5 (Supplemental Fig. 5A-E). Indeed, overrepresentation analysis  
156 of the DEG ( $\text{padj} \leq 0.05$ ) showed enrichment of several pathways related to stress and immune  
157 responses in the left cartilage (Supplemental Fig. 5F). In particular, we found several stress-related  
158 transcripts that shared a similar left-right pattern of expression within each embryo (Supplemental  
159 Fig. 5G) and verified their enrichment in the left cartilage by qRT-PCR (Fig. 4E) or *in situ*  
160 hybridisation (Fig. 4F). *Relaxin1*, the closest homologue to *dilp8*, the recently identified[3,22] alarm  
161 gene in fly, was not expressed at significant levels in either limb (Supplemental Fig. 5E), suggesting  
162 the mechanisms that link the local insult with a systemic response have diverged during evolution.  
163 Regarding the relationship between the extent of insult and the systemic response, *Pit-tTA-p21* mice  
164 did not trigger a systemic growth defect at E17.5 or P0 (Supplemental Fig. 3D-E, summary in Fig.  
165 5A), suggesting that the systemic growth reduction is also only triggered when a certain insult  
166 threshold is surpassed in the targeted cartilage.  
167 *The systemic growth reduction of ePit-Col-p21 embryos involves impaired placental function and is*  
168 *necessary to maintain limb/body proportions*

169 We reasoned that the most likely organ to respond to a circulating alarm signal is the placenta, as  
170 in rodents it produces higher insulin-like growth factor (IGF) levels than any other organ[23] and is



171 considered the main organ controlling foetal growth[24], whereas hepatic IGFs regulate systemic  
172 growth mainly after weaning[25]. Interestingly, placental weight was not diminished in *ePit-Col-p21*  
173 embryos as compared to *ePit-p21* controls (Supplemental Fig. 6A), such that the placenta/body  
174 weight ratio was increased (Fig. 5B). These results suggest that placental efficiency is reduced in  
175 response to the cartilage insult. Indeed, levels of *Igf2r* mRNA, which encodes a decoy receptor that  
176 decreases local IGF2 bioavailability[26], were increased in the placenta of *ePit-Col-p21* embryos  
177 compared to *ePit-p21* controls (Fig. 5C). To test if the systemic growth reduction in *ePit-Col-p21*  
178 embryos was due to impaired placental IGF signalling, we injected pregnant dams with an IGF2  
179 analogue that can only bind IGF2R, and was thus expected to increase bioavailability of endogenous  
180 IGF2 and placental efficiency[27]. Confirming a role for placental function, *ePit-Col-p21* body  
181 weight and right femur length were significantly rescued in the treated litters, whereas placental  
182 weight remained unchanged (Fig. 5D-F and Supplemental Fig. 6B-D). Rescue of the systemic effect  
183 did not, however, result in left-right asymmetry in *ePit-Col-p21* embryos (Fig. 5G). However, the  
184 femur/body weight ratio of rescued *ePit-Col-p21* embryos was diminished compared to *ePit-p21*  
185 littermates or untreated litters (Fig. 5H). These results suggest that a decrease in growth of the  
186 unmanipulated limb contributes to the maintenance of left-right symmetry upon a unilateral insult,  
187 and that systemic growth reduction is therefore necessary to maintain limb/body proportions.

188 Furthermore, the fact that left and right limbs are equally reduced in length suggests there is direct  
189 left-right crosstalk between the limbs, as previously proposed in studies on amphibian  
190 regeneration[28] and tibial fracture healing in young rats[29].

#### 191 *A holistic view of the compensatory responses triggered by developmental insults*

192 Collectively, our results reveal that the processes leading to coordination of growth within and  
193 between organs to achieve normal proportions upon developmental insults are conserved across

194 metazoans. We propose that when an organ experiences developmental or environmental  
195 perturbations, an adaptive growth response that involves cell-nonautonomous local mechanisms  
196 interacting with systemic changes is initiated during the insult time frame to ensure that body  
197 proportions are maintained (Supplemental Fig. 7). The magnitude of the contributions of local and  
198 systemic mechanisms likely varies across phyla, however, as the extent of the systemic growth  
199 reduction observed in mice seems to be less extreme than in *Drosophila*. Finally, we speculate that  
200 the same ‘alarm’ signal triggers both the intrinsic and systemic mechanisms following injury, which  
201 would provide an evolutionary advantageous strategy to achieve robust coordination of organ  
202 growth. Further exploration of the mechanisms underlying these phenomena will open new exciting  
203 avenues for basic and translational research, and lead to a better understanding of human growth  
204 disorders.

## 205 **Methods**

### 206 *Study Design*

207 For each experiment, the minimum sample size was estimated using an online tool  
208 (<http://powerandsamplesize.com/Calculators>), based on the average SD observed in pilot  
209 experiments, to achieve an effect size of 3% (left/right bone length ratio), or 10% (rest of  
210 parameters), with a power of 0.8 and a 95% confidence interval. In Fig. 4B-C, two embryos (one  
211 from the *ePit-Col-p21* and one from the *eCol-tdT* populations) were abnormally small, possibly  
212 dead, and were excluded from the analysis. For comparison of qualitative expression, a minimum  
213 of two specimens per stage and five across several stages were used. The investigator measuring  
214 bone length was blinded to the treatment/genotype of the specimens. No blinding was done for  
215 other measurements. No randomization was used for animal processing.

### 216 *Statistics*

217 When data were available for control and experimental, a normalised measurement (left/right  
218 ratio or % of average control mice) was calculated for both. Between different time points, the  
219 normalised measurements were compared by multiple unpaired t-test with Holm-Sidak  
220 correction for multiple comparisons. Within the same time point, comparisons were done by an  
221 unpaired Mann-Whitney test (one variable and two conditions), or by one-way ANOVA (one  
222 variable and  $\geq 3$  conditions) or by 2-way ANOVA (two variables and two or more conditions),  
223 following a matched (paired) design when possible. When left and right measurements were  
224 compared within experimental animals only, paired two-tailed t-test was used. For all ANOVA,  
225  $\alpha=0.05$ . All relevant parameters for the statistical tests can be found on Supplemental Table  
226 3. When parametric tests were used, data normality was confirmed by Shapiro-Wilk test, and  
227 equality of variance by F-test. Prism7 software (Graphpad) was used for most analyses. Most  
228 graphs show individual values and mean $\pm$ SD, unless otherwise indicated.

### 229 *Mice*

230 To generate the *Igs7<sup>TRE-LtSL-p21</sup>* mouse line, the *NruI*-STOP-loxP-tdTomato-*SnaBI* fragment in the  
231 *Ai62(TITL-tdT) Flp-in* replacement vector[17] was replaced by a custom *NruI*-tdTomato-STOP-  
232 loxP-*MluI*-*HpaI*-*SnaBI* cassette, to generate an empty DRAGON vector. A PCR-amplified  
233 Kozak-Cdkn1a cassette was subsequently cloned into the *MluI* and *SnaBI* sites to generate the  
234 *DRAGON-p21* vector. This vector was then used for recombinase-mediated cassette exchange  
235 into *Igs7*-targeted G4 ES cells[17]. Two successfully targeted clones were injected into C2J  
236 blastocysts to generate chimeras, obtaining 27 chimeric males (out of 30 born) with 75-100%  
237 chimaerism. Two males from each clone were crossed to Black Swiss mice (Charles River) to  
238 assess germline transmission, and to establish the new mouse lines. To generate the *Col2a1-tTA*  
239 line, a *Kozak-tTA* fragment was PCR-amplified from plasmid *pEnt LIL3 tTA-3* (Addgene

240 #27105) and cloned into a vector containing the regulatory region of mouse *Col2a1* obtained  
241 from plasmid *p3000i3020Col2a1* (ref. [30]). Backbone-free vector DNA was injected into FVB  
242 zygotes to generate transgenic lines. Four out of 11 founders transmitted the *Col2a1-tTA* allele.  
243 The progeny of one of those (founder #92) expressed the tTA faithfully in the highest percentage  
244 of chondrocytes, and was bred with *Pitx2-Cre* animals to generate breeders for the experiments.  
245 *Col2a1-tTA* mice were maintained on an outbred Swiss Webster background and genotyped  
246 using primers *Col2a1-F* (CCAGGGTTTCCTTGATGATG) and *tTA-R*  
247 (GCTACTTGATGCTCCTGATCCTCC) and a standard PCR program with 55°C annealing  
248 temperature. The *Pitx2-Cre*[19] (kind gift of Dr. H. Hamada), *Col2a1-rtTA*[20] (kind gift of Dr.  
249 K. Posey), *Ai9* (*R26<sup>CAGGS-LSL-tdTomato</sup>*)[31] and *Ai62* (*Igs7<sup>TRE-LSL-tdTomato</sup>*)[17] mouse lines were  
250 maintained on an outbred Swiss Webster background and genotyped as previously described.  
251 *Igs7<sup>TRE-LSL-p21</sup>* animals were genotyped like *Ai62* mice. *Pitx2-Cre/Cre; Col2a1-(r)tTA/+* females  
252 and males homozygous for the conditional misexpression allele were crossed to generate  
253 experimental and control animals. Noon of the day of vaginal plug detection was considered  
254 E0.5. The equivalent of E19.5 is referred to as P0.

#### 255 *Doxycycline treatment*

256 Doxycycline hyclate (Sigma) was added to the drinking water at a final concentration of 1  
257 mg/ml, with 1% sucrose to increase palatability.

#### 258 *Leu<sup>27</sup>-IGF2 injections*

259 Human Leu<sup>27</sup>-IGF2 (GroPep) was prepared at 500 ng/μl in sterile 0.01N HCl solution and kept at  
260 4°C in between injections. From E15.25 to E17.25, the pregnant dam was subcutaneously  
261 injected every 8 hours, for a total dose of 1 μg/g of bodyweight per day.

#### 262 *Skeletal preparations and measurements*

263 Staining of cartilage and bone was performed as described[32]. For young mouse pups ( $\leq P5$ ),  
264 bone length was measured on digital microphotographs using the Line tool in Adobe Photoshop.  
265 Unless otherwise indicated, only the ossified region was measured. For adolescent and adult  
266 mice, the limbs were dissected out, skinned and incubated for a controlled time in 2% KOH at  
267 37°C to remove the soft tissues. Individual bones were then measured using digital callipers  
268 (EZCal from iGaging). Tibiae were measured from the intercondylar eminence to the distal  
269 articular surface, while femora were measured from the trochanteric fossa to the intercondylar  
270 fossa.

#### 271 *Sample processing for histology*

272 Mouse embryos were euthanized by hypothermia in cold PBS. Mouse pups were euthanized by  
273 decapitation after hypothermia-induced analgesia. Knees (or isolated full tibiae and femora) were  
274 dissected out, skinned and fixed by immersion in 4% paraformaldehyde (PFA, Electron  
275 Microscopy Sciences) in PBS for 2 days at 4°C. After several washes with PBS, the tissue was  
276 then cryoprotected first by brief incubation with a solution of 15% sucrose and then 30% sucrose  
277 in PBS for at least 4 hours at 4°C, and then embedded in Cryomatrix (Thermo) using dry-ice-cold  
278 isopentane (Sigma). The knees were oriented sagittally and facing each other, with the tibiae on  
279 the bottom of the block (i.e. closest to the blade when sectioning). Serial 7-micron sections were  
280 collected with a Leica Cryostat on Superfrost slides, allowed to dry for at least 30 min and stored  
281 at -80°C until used. For all histological techniques, frozen slides were allowed to reach room  
282 temperature in a closed box, and Cryomatrix was washed away for 15 minutes with warm PBS  
283 (37°C).

#### 284 *Immunohistochemistry and TUNEL*

285 Sections were incubated in citrate buffer (10 mM citric acid, 0.05% Tween 20, pH 6.0) for 15

286 min at 90°C, allowed to cool down, washed with PBSTx (PBS containing 0.1% Triton X-100),  
287 blocked with 5% BSA in PBSTx 30 min at RT, and incubated with the primary antibody over  
288 night at 4°C (see list of antibodies below). After PBSTx washes, incubation with Alexa647-  
289 and/or Alexa555-conjugated secondary antibodies (Molecular Probes, 1/500 in PBSTx with  
290 DAPI) was performed for 1 h at RT. After PBSTx washes, the slides were mounted with Fluoro-  
291 Gel (Electron Microscopy Sciences). For TUNEL staining, endogenous biotin was blocked after  
292 antigen retrieval using the Avidin/Biotin blocking kit (Vector #SP-2001), and TdT enzyme and  
293 Biotin-16-dUTP (Sigma #3333566001 and #11093070910) were subsequently used following  
294 manufacturer instructions. Biotin-tagged DNA nicks were revealed with Alexa488- or Alexa647-  
295 conjugated streptavidin (Molecular Probes, 1/1000) during the incubation with the secondary  
296 antibody.

297 *Antibodies* (host species, vendor, catalogue#, dilution): tdTomato (rabbit polyclonal, Rockland  
298 #600-401-379, 1/500), p21 (rabbit polyclonal, Santa Cruz Biotechnology #sc-471, 1/300), p19<sup>Arf</sup>  
299 (rat monoclonal, clone 12-A1-1, Novus Biologicals #NB200-169, 1/100).

### 300 *In situ hybridisation*

301 The protocol described in[33] was followed. For embryos and young pups (P1-P5), samples were  
302 not decalcified. Except for *Col2a1*, *Coll0a1* and *Ihh* (provided by Dr. Licia Selleri), the  
303 templates for most riboprobes were generated by PCR from embryonic cDNA, using primers  
304 containing the SP6 or T7 RNA polymerase promoters. Sequence of the primers is available upon  
305 request. After purification of the PCR product (Qiagen PCR purification kit), DIG-labelled  
306 probes were transcribed following manufacturer instructions (Roche), treated with DNAase for  
307 30 min and purified by LiCl-mediated precipitation in alcoholic solvent. Probes were kept at -  
308 80°C in 50% formamide (Fluka). For immunohistochemistry after *in situ* hybridisation, sections

309 were incubated in citrate buffer (10 mM citric acid, 0.05% Tween 20, pH 6.0) for 15 min at  
310 90°C, allowed to cool down, washed with PBSTx, and incubated with 1% H<sub>2</sub>O<sub>2</sub> in PBSTx for 1  
311 hour to block endogenous peroxidases. After BSA blocking and primary antibody incubation,  
312 endogenous biotin was blocked using Avidin/Biotin Blocking kit (Vector #SP-2001), and then  
313 the slides were incubated with a biotinylated secondary antibody. A brown precipitate was  
314 obtained using a peroxidase-coupled streptavidin-biotin complex (Vectastain Elite ABC Kit,  
315 Vector #PK-6100) and DAB substrate (Vector #SK-4100), following manufacturer instructions.

### 316 *Imaging*

317 Bright-field and fluorescence images were taken on a Zeiss inverted microscope (Observer.Z1)  
318 using Axiovision software (Zeiss). Mosaic pictures were automatically reconstructed from  
319 individual 10x (brightfield) or 20x (fluorescence) tiles.

### 320 *EdU incorporation*

321 5 mg/ml EdU in PBS was injected (50 µg/g body weight, s.c for pups, i.p. for adults and  
322 pregnant females) 1.5 h before euthanising the mice. EdU was detected using the Click-iT  
323 Alexa488 Imaging Kit (Invitrogen, C-10337), once the immunohistochemistry and/or TUNEL  
324 staining were finished on the same slides. The fraction of nuclei that were positive for EdU, p21  
325 or tdTomato in the proliferative zone of the cartilage was determined using ImageJ.

### 326 *Cell size analysis*

327 The proliferative zone was cropped from imaged sections of left and right *Pit-Col-p21* proximal  
328 tibial cartilage. tdTomato<sup>+</sup> chondrocytes were segmented, measured and counted using Cell  
329 Profiler.

### 330 *RNA isolation and analysis*

331 The distal left or right femoral and proximal tibial cartilage from E17.5 *Pit-Col-p21* embryos

332 were dissected in cold PBS, the condyles and hypertrophic zones removed using a microknife,  
333 and the perichondrium removed by a combination of collagenase type II treatment (Worthington,  
334 2mg/ml in DMEM, 2 min at room temperature) and mechanical dissection. Left and right  
335 cartilage fragments from each embryo (#1, 2 and 3) were kept in separated tubes and flash-frozen  
336 in liquid nitrogen. RNA was extracted using Trizol (Invitrogen) and a mechanical tissue  
337 disruptor.

#### 338 *RNA-seq.*

339 High quality RNA was deep sequenced ( $\geq 50$  million paired-end reads) by the New York  
340 Genome Center. Aligned reads were analysed using DESeq2 tool in R. A paired design was  
341 used, such that left and right comparison was performed for each specimen, which minimized the  
342 effect of sequencing batch and inter-specimen variability. Differentially expressed genes were  
343 obtained using a threshold of adjusted p-value  $\leq 0.05$ . NMF library tools were used to generate  
344 heatmaps. Enrichment analysis was performed using DAVID[34] and WebGestalt[35].

#### 345 *qRT-PCR.*

346 cDNA was synthesized from purified RNA using iScript reverse transcriptase (RT) as described  
347 by the manufacturer (Bio-Rad). Each target was amplified in triplicate, to obtain an average per  
348 sample, using SYBR Green (Applied Biosystems) on a StepOnePlus realtime PCR system  
349 (Applied Biosystems). Primer sequences are shown in Supplemental Table 4. Negative controls  
350 (no template) and no-RT cDNA controls were included for each primer/sample combination.  
351 Relative expression on each sample was calculated by the  $2^{-\Delta\text{CT}}$  method, with *Gapdh* (for  
352 cartilage) or *Tbp* (for placenta) as a reference.

#### 353 **Study approval**

354 All animal studies were performed under an approved Institutional Animal Care and Use



355 Committee mouse protocol according to MSKCC institutional guidelines.

## 356 **Data availability**

357 The datasets generated during and/or analysed during the current study are tabulated in the

358 Supplemental Information and archived at the following databases: GSE97232.

## 359 **References**

- 360 1. Schubiger G (1971) Regeneration, duplication and transdetermination in fragments of the leg disc of *Drosophila*
- 361 *melanogaster*. *Dev Biol* 26: 277-295.
- 362 2. Hussey RG, Thompson WR, Calhoun ET (1927) The Influence of X-Rays on the Development of *Drosophila*
- 363 *Larvae*. *Science* 66: 65-66.
- 364 3. Colombani J, Andersen DS, Leopold P (2012) Secreted peptide Dilp8 coordinates *Drosophila* tissue growth with
- 365 developmental timing. *Science* 336: 582-585.
- 366 4. Jaszczak JS, Wolpe JB, Dao AQ, Halme A (2015) Nitric Oxide Synthase Regulates Growth Coordination During
- 367 *Drosophila melanogaster* Imaginal Disc Regeneration. *Genetics* 200: 1219-1228.
- 368 5. Vallejo DM, Juarez-Carreno S, Bolivar J, Morante J, Dominguez M (2015) A brain circuit that synchronizes
- 369 growth and maturation revealed through Dilp8 binding to Lgr3. *Science* 350: aac6767.
- 370 6. Mollereau B, Perez-Garijo A, Bergmann A, Miura M, Gerlitz O, et al. (2013) Compensatory proliferation and
- 371 apoptosis-induced proliferation: a need for clarification. *Cell Death Differ* 20: 181.
- 372 7. Diaz-Garcia S, Ahmed S, Baonza A (2016) Analysis of the Function of Apoptosis during Imaginal Wing Disc
- 373 Regeneration in *Drosophila melanogaster*. *PLoS One* 11: e0165554.
- 374 8. Tanner JM (1963) Regulation of Growth in Size in Mammals. *Nature* 199: 845-850.
- 375 9. Gafni RI, Weise M, Robrecht DT, Meyers JL, Barnes KM, et al. (2001) Catch-up growth is associated with
- 376 delayed senescence of the growth plate in rabbits. *Pediatr Res* 50: 618-623.
- 377 10. Prader A, Tanner JM, von Harnack G (1963) Catch-up growth following illness or starvation. An example of
- 378 developmental canalization in man. *J Pediatr* 62: 646-659.
- 379 11. Baron J, Klein KO, Colli MJ, Yanovski JA, Novosad JA, et al. (1994) Catch-up growth after glucocorticoid
- 380 excess: a mechanism intrinsic to the growth plate. *Endocrinology* 135: 1367-1371.
- 381 12. Kronenberg HM (2003) Developmental regulation of the growth plate. *Nature* 423: 332-336.
- 382 13. Lui JLC, Nilsson O, Baron J (2011) Growth Plate Senescence and Catch-Up Growth. *Cartilage and Bone*
- 383 *Development and Its Disorders* 21: 23-29.
- 384 14. Lui JC, Forcinito P, Chang M, Chen W, Barnes KM, et al. (2010) Coordinated postnatal down-regulation of
- 385 multiple growth-promoting genes: evidence for a genetic program limiting organ growth. *FASEB J* 24:
- 386 3083-3092.
- 387 15. Rosello-Diez A, Joyner AL (2015) Regulation of Long Bone Growth in Vertebrates; It Is Time to Catch Up.
- 388 *Endocr Rev* 36: 646-680.
- 389 16. Wit J, Boersma B (2002) Catch-up growth: definition, mechanisms, and models. *J Pediatr Endocrinol Metab* 15
- 390 *Suppl* 5: 1229-1241.
- 391 17. Madisen L, Garner AR, Shimaoka D, Chuong AS, Klapoetke NC, et al. (2015) Transgenic Mice for
- 392 Intersectional Targeting of Neural Sensors and Effectors with High Specificity and Performance. *Neuron*
- 393 85: 942-958.
- 394 18. Harper JW, Adami GR, Wei N, Keyomarsi K, Elledge SJ (1993) The p21 Cdk-interacting protein Cip1 is a
- 395 potent inhibitor of G1 cyclin-dependent kinases. *Cell* 75: 805-816.
- 396 19. Shiratori H, Yashiro K, Shen MM, Hamada H (2006) Conserved regulation and role of Pitx2 in situs-specific
- 397 morphogenesis of visceral organs. *Development* 133: 3015-3025.
- 398 20. Posey KL, Veerisetty AC, Liu P, Wang HR, Poindexter BJ, et al. (2009) An inducible cartilage oligomeric
- 399 matrix protein mouse model recapitulates human pseudoachondroplasia phenotype. *Am J Pathol* 175: 1555-
- 400 1563.
- 401 21. Rosello-Diez A, Stephen D, Joyner AL (2017) Altered paracrine signaling from the injured knee joint impairs
- 402 postnatal long bone growth. *Elife* 6.
- 403

- 404 22. Garelli A, Gontijo AM, Miguela V, Caparros E, Dominguez M (2012) Imaginal discs secrete insulin-like peptide  
405 8 to mediate plasticity of growth and maturation. *Science* 336: 579-582.
- 406 23. White V, Jawerbaum A, Mazzucco MB, Gauster M, Desoye G, et al. (2015) Diabetes-associated changes in the  
407 fetal insulin/insulin-like growth factor system are organ specific in rats. *Pediatr Res* 77: 48-55.
- 408 24. Sferruzzi-Perri AN, Sandovici I, Constancia M, Fowden AL (2017) Placental phenotype and the insulin-like  
409 growth factors: resource allocation to fetal growth. *J Physiol* 595: 5057-5093.
- 410 25. Stratikopoulos E, Szabolcs M, Dragatsis I, Klinakis A, Efstratiadis A (2008) The hormonal action of IGF1 in  
411 postnatal mouse growth. *Proc Natl Acad Sci U S A* 105: 19378-19383.
- 412 26. Ludwig T, Eggenschwiler J, Fisher P, D'Ercole AJ, Davenport ML, et al. (1996) Mouse mutants lacking the type  
413 2 IGF receptor (IGF2R) are rescued from perinatal lethality in *Igf2* and *Igf1r* null backgrounds. *Dev Biol*  
414 177: 517-535.
- 415 27. Charnock JC, Dilworth MR, Aplin JD, Sibley CP, Westwood M, et al. (2016) The impact of a human IGF-II  
416 analog ([Leu27]IGF-II) on fetal growth in a mouse model of fetal growth restriction. *Am J Physiol*  
417 *Endocrinol Metab* 310: E24-31.
- 418 28. Tweedle C (1971) Transneuronal effects on amphibian limb regeneration. *J Exp Zool* 177: 13-29.
- 419 29. Fischerauer EE, Manninger M, Seles M, Janezic G, Pichler K, et al. (2013) BMP-6 and BMPR-1a are up-  
420 regulated in the growth plate of the fractured tibia. *J Orthop Res* 31: 357-363.
- 421 30. Zhou G, Garofalo S, Mukhopadhyay K, Lefebvre V, Smith CN, et al. (1995) A 182 bp fragment of the mouse  
422 pro alpha 1(II) collagen gene is sufficient to direct chondrocyte expression in transgenic mice. *J Cell Sci*  
423 108 ( Pt 12): 3677-3684.
- 424 31. Madisen L, Zwingman TA, Sunkin SM, Oh SW, Zariwala HA, et al. (2010) A robust and high-throughput Cre  
425 reporting and characterization system for the whole mouse brain. *Nat Neurosci* 13: 133-140.
- 426 32. Rigueur D, Lyons KM (2014) Whole-mount skeletal staining. *Methods Mol Biol* 1130: 113-121.
- 427 33. Nomura S, Hirota S (2003) In Situ Hybridization of Bone and Cartilage. In: An YH, Martin KL, editors.  
428 *Handbook of Histology Methods for Bone and Cartilage*. Totowa, NJ: Humana Press. pp. 321-327.
- 429 34. Huang da W, Sherman BT, Lempicki RA (2009) Systematic and integrative analysis of large gene lists using  
430 DAVID bioinformatics resources. *Nat Protoc* 4: 44-57.
- 431 35. Zhang B, Kirov S, Snoddy J (2005) WebGestalt: an integrated system for exploring gene sets in various  
432 biological contexts. *Nucleic Acids Res* 33: W741-748.
- 433 36. Di Masso RJ, Silva PS, Font MT (2000) Asymptotic weight and maturing rate in mice selected for body  
434 conformation. *Genetics and Molecular Biology* 23: 335-340.
- 435 37. Scopes RK, Smith JA (2001) *Analysis of Proteins*. Current Protocols in Molecular Biology: John Wiley & Sons,  
436 Inc.
- 437 38. Zhang F, Kumano M, Beraldi E, Fazli L, Du C, et al. (2014) Clusterin facilitates stress-induced lipidation of  
438 LC3 and autophagosome biogenesis to enhance cancer cell survival. *Nat Commun* 5: 5775.
- 439 39. Ons S, Marti O, Armario A (2004) Stress-induced activation of the immediate early gene *Arc* (activity-regulated  
440 cytoskeleton-associated protein) is restricted to telencephalic areas in the rat brain: relationship to *c-fos*  
441 mRNA. *J Neurochem* 89: 1111-1118.
- 442 40. Willenberg HS, Path G, Vogeli TA, Scherbaum WA, Bornstein SR (2002) Role of interleukin-6 in stress  
443 response in normal and tumorous adrenal cells and during chronic inflammation. *Ann N Y Acad Sci* 966:  
444 304-314.
- 445 41. Kim SR, Kim HJ, Kim DI, Lee KB, Park HJ, et al. (2015) Blockade of Interplay between IL-17A and  
446 Endoplasmic Reticulum Stress Attenuates LPS-Induced Lung Injury. *Theranostics* 5: 1343-1362.
- 447

## 448 **Supplemental Information**

449 Supplemental Figures 1-7

450 Supplemental Tables 1 to 4

451 References [30-41]

452 **Acknowledgements**

453 We thank the Joyner lab for scientific discussions, D. Stephen for technical support, N.S. Bayin,  
454 J.M. González-Rosa and A. Wojcinski for comments on the manuscript, the Mouse Genetics  
455 core for generating chimeras and new transgenic lines, B. de Crombrughe for the  
456 *p3000i3020Col2a1* vector and H. Hamada and K. Posey for the *Pitx2-Cre* and *Col2a1-rtTA*  
457 mouse lines, respectively. This work was supported by grant R21HD083860 (NIH-NICHD) to  
458 A.L.J., HFSP and Charles Revson postdoctoral fellowships to A.R.D and an NCI Cancer Center  
459 Support Grant (P30 CA008748) to MSKCC.

460 **Author contributions**

461 A.R.D. conceived the approach, proposed the hypotheses and performed most experiments. L.M.  
462 and H.Z. generated and provided the *Igs7*-targeted ES cells. S.B. helped with the characterization  
463 of the systemic growth reduction. A.R.D. and A.L.J. designed the study, interpreted results and  
464 wrote the manuscript. A.L.J. supervised the study.

465 **Author information**

466 The authors declare that no competing financial interests exist.

467 Correspondence to: joynera@mskcc.org, roselloa@mskcc.org

468 **Figures and legends**

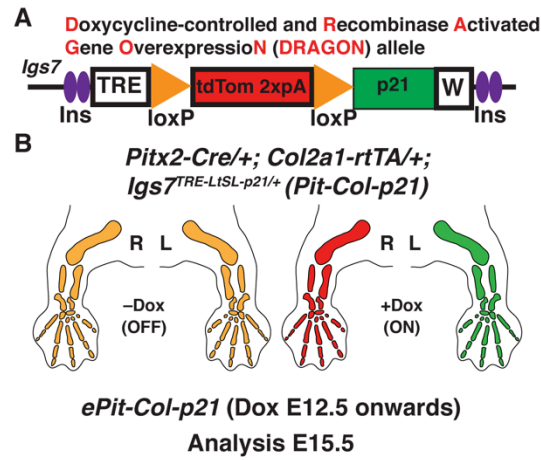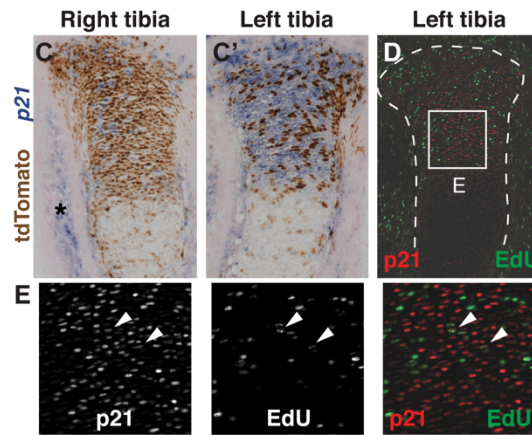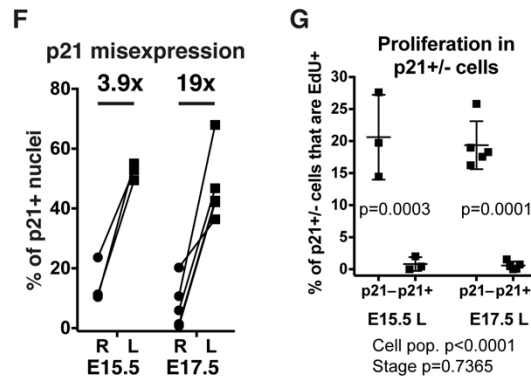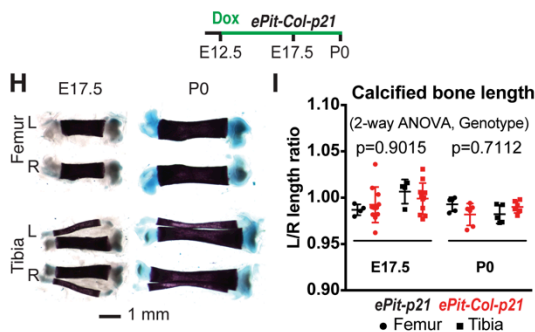

470 **Figure 1. Mosaic local proliferation blockade in the left limb cartilage does not lead to a**  
471 **major left-specific bone growth reduction. (A)** *DRAGON-p21* allele in the *Igs7* locus.  
472 Ins=insulator, TRE=Tetracycline-responsive element, 2xpA=transcriptional STOP, W=WPRE  
473 (mRNA-stabilizing sequence) followed by pA. **(B)** Schematic showing *p21* expression driven by  
474 the left-specific *Pitx2-Cre* and cartilage-specific *Col2a1-rtTA* (*Pit-Col-p21*). **(C-E)** Expression of  
475 tdT protein and *p21* mRNA (C, C'), and p21 protein and EdU (D, E) at E15.5, with Dox  
476 administered at E12.5. n=3. Box in (D) is magnified in (E). Asterisk=endogenous *p21*  
477 expression. Arrowheads=rare double-positive cells. **(F)** Quantification of p21<sup>+</sup> cells in the  
478 proliferative zone of *ePit-Col-p21* proximal tibias, at E15.5 (n=3) and E17.5 (n=5). The average  
479 left/right fold-change is indicated. **(G)** Quantification of EdU incorporation in p21<sup>+</sup> and p21<sup>-</sup>  
480 cells of left *ePit-Col-p21* proliferative zone of the cartilage, at E15.5 and E17.5 (n=3 and 5).  
481 Comparison by 2-way ANOVA with Cell population and Stage as variables (p-values below  
482 graphs). p-values for Sidak's multiple comparisons posthoc test (between Cell populations) are  
483 shown on the graph. **(H, I)** Skeletal preparations (H) and quantification of the left/right ratio [(I),  
484 mean±SD] of the calcified region of femur and tibia at E17.5 (n=4 *ePit-p21* and 11 *ePit-Col-p21*  
485 mice) and P0 (n=5 and 6). At each stage, data were analysed by 2-way ANOVA with Genotype  
486 and Bone identity as variables. p-values for Genotype are shown.

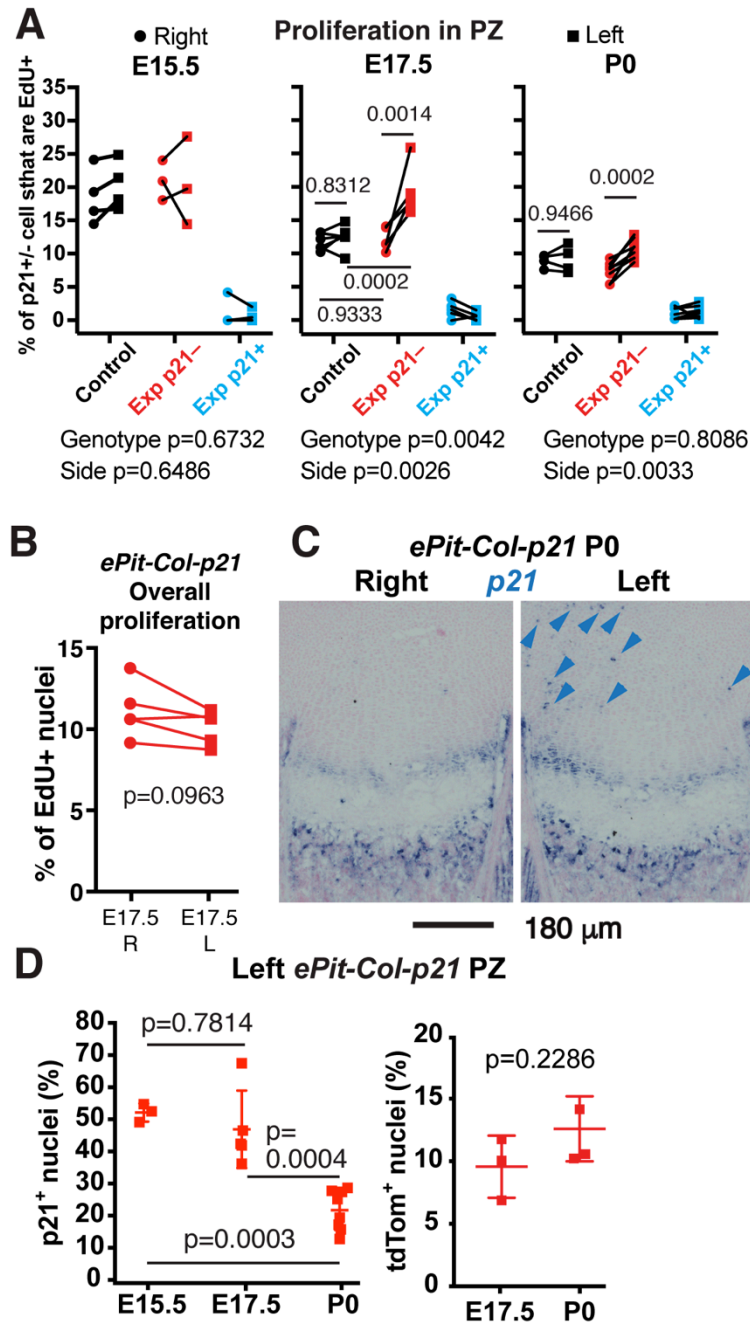

487

488 **Figure 2. Cell-nonautonomous compensation by spared neighbours in response to mosaic**  
 489 **blockade of chondrocyte proliferation.** (A) % of p21<sup>+</sup> or p21<sup>-</sup> chondrocytes that have EdU<sup>+</sup>  
 490 nuclei in the proliferative zone (PZ) in the left and right tibias of E15.5, E17.5 and P0 *ePit-p21*  
 491 (Control, n=4, 6 and 4) and *ePit-Col-p21* (Exp, n=3, 5 and 8) embryos. p21<sup>-</sup> cells from Control  
 492 and Exp mice were compared by 2-way ANOVA with Side and Genotype as variables (p-values

493 below graphs). For each significant variable, p-values for Sidak's multiple comparisons posthoc  
494 test are shown. **(B)** % of EdU<sup>+</sup> chondrocytes in the PZ of left and right proximal tibias of E17.5  
495 *ePit-Col-p21* embryos, without distinguishing by p21 expression. Comparison by paired two-  
496 tailed t-test. **(C-D)** *In situ* hybridisation of *p21* [(C), arrowheads denote ectopic expression] and  
497 quantification of tdT and p21 (D) on sections of left *ePit-Col-p21* tibial GPs at E15.5, E17.5 and  
498 P0. n=3, 5 and 8 for p21; 3 at each stage for tdT. The % of p21<sup>+</sup> cells was compared by one-way  
499 ANOVA (p<0.0001). p-values for Tukey's multiple comparisons posthoc test are shown. The %  
500 of tdT<sup>+</sup> cells (a proxy for rtTA activity) was compared by unpaired two-tailed Mann-Whitney  
501 test.

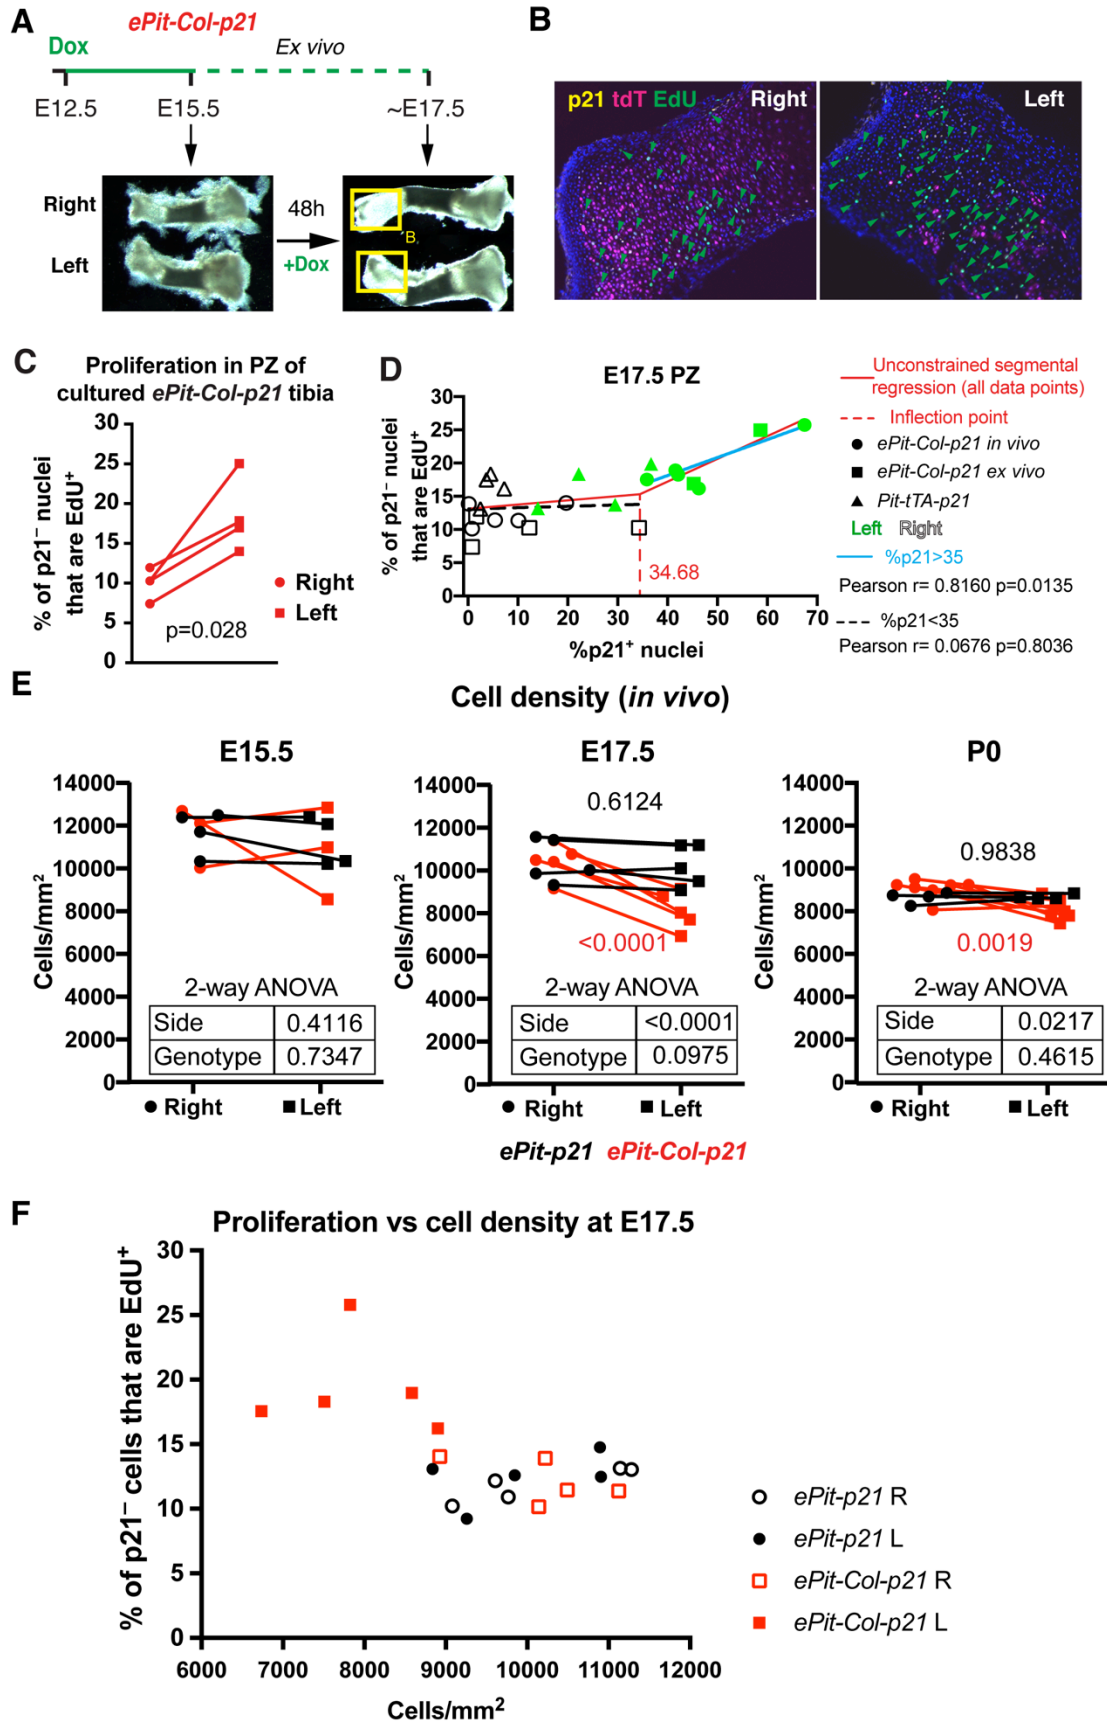



503 **Figure 3. Compensatory proliferation takes place when cell density in the growth plate is**  
504 **lower than normal. (A)** Summary of the *ex vivo* tibial culture experiment. The boxed regions  
505 correspond to the GPs shown in (B). **(B)** Immunohistochemistry for the indicated molecules  
506 (arrowheads= EdU<sup>+</sup> chondrocytes). **(C)** EdU quantification on distal GP sections obtained from  
507 E15.5 *ePit-Col-p21* tibiae cultured for two days. p-value for two-tailed paired t-test comparing  
508 left and right proliferative ratios of p21<sup>-</sup> chondrocytes is shown (n=4). The distal GP was  
509 quantified because the proximal one (bulkier) shows proliferation only in the periphery. **(D)**  
510 Correlation analysis between the extent of EdU incorporation in p21<sup>-</sup> cells and the amount of  
511 p21<sup>+</sup> nuclei in left and right PZ of *ePit-Col-p21* (n=5 *in vivo* and 4 *ex vivo*) and *Pit-tTA-p21* GPs  
512 (n=4) at E17.5. The inflection point revealed by unconstrained segmental regression was rounded  
513 up and used as a dividing threshold for the two correlation analyses (colour-coded). Pearson  
514 correlation coefficients and two-tailed p-values are shown. **(E)** Comparison of chondrocyte  
515 density in the proliferative zone (PZ) of left and right *ePit-p21* and *ePit-Col-p21* tibial GPs at  
516 E15.5 (n=4 and 3), E17.5 (n=5 and 5) and P0 (n=4 and 7) and analysed by 2-way ANOVA for  
517 Genotype and Side (p-values shown in the embedded tables). When p<0.05 for these variables,  
518 Sidak's post-hoc tests are shown. **(F)** EdU incorporation in p21<sup>-</sup> chondrocytes of left and right  
519 PZ from E17.5 *ePit-p21* and *ePit-Col-p21* embryos (n=5 each), plotted against cell density in the  
520 PZ. Note the sharp change in proliferation beyond 9,000 cells/mm<sup>2</sup>.

521

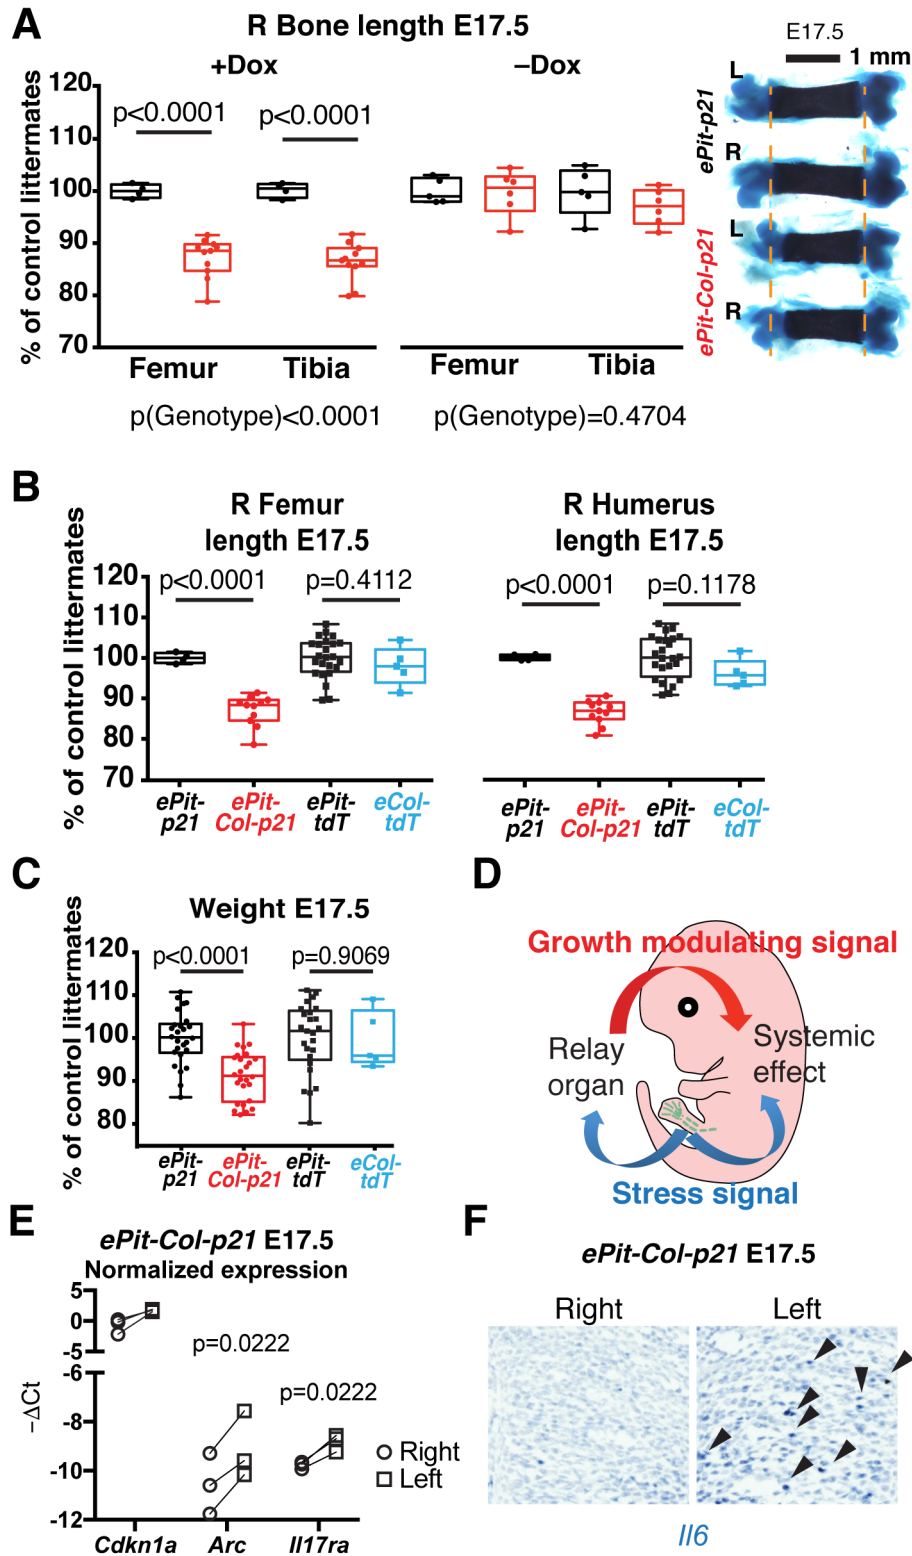

522

523 **Figure 4. Mosaic local proliferation blockade in chondrocytes of the left limb results in**

524 **systemic growth reduction.** (A) Right femur and tibia length (normalised to the average *ePit-*  
525 *p21* littermate) from E17.5 embryos treated with Dox (n=4 *ePit-p21* and 11 *ePit-Col-p21*) or  
526 untreated (n=5 and 6). Comparison by 2-way ANOVA with Genotype and Bone identity as  
527 variables. p-values for Genotypes are shown below graphs, p-values for Sidak's post-hoc test  
528 shown on graph. Femoral skeletal preparations are shown on the right (dashed lines flank the  
529 ossified region in control bones). (B-C) Box and whiskers plots for normalised bone length (B)  
530 and weight (C) of *ePit-Col-p21* and *Col2a1-rtTA; Igs7<sup>TRE-tdT/+</sup>* embryos (*eCol-tdT*, expressing  
531 tdT in all cartilage elements), compared by multiple unpaired t-tests. p-values corrected for  
532 multiple comparisons (Holm-Sidak method) are shown. For (B), n=22 *ePit-p21*, 26 *ePit-Col-p21*,  
533 25 *ePit-tdT* and 5 *eCol-tdT*. For (C), n=4, 11, 24 and 5. (D) Model of the systemic growth  
534 response after local chondrocyte arrest triggers an alarm signal. (E-F) qRT-PCR (E) and *in situ*  
535 hybridisation (F) for the indicated transcripts in GPs from *ePit-Col-p21* embryos. (E) shows one  
536 of two independent experiments with 3 distinct biological replicates each (n total=6). The  $-\Delta Ct$   
537 (relative to *Gapdh*) for each stress-related transcript was compared by a paired t-test (left vs.  
538 right). In (F), n=2 E15.5, 4 E16.5 and 6 E17.5 embryos (arrowheads denote *Il6* expression).

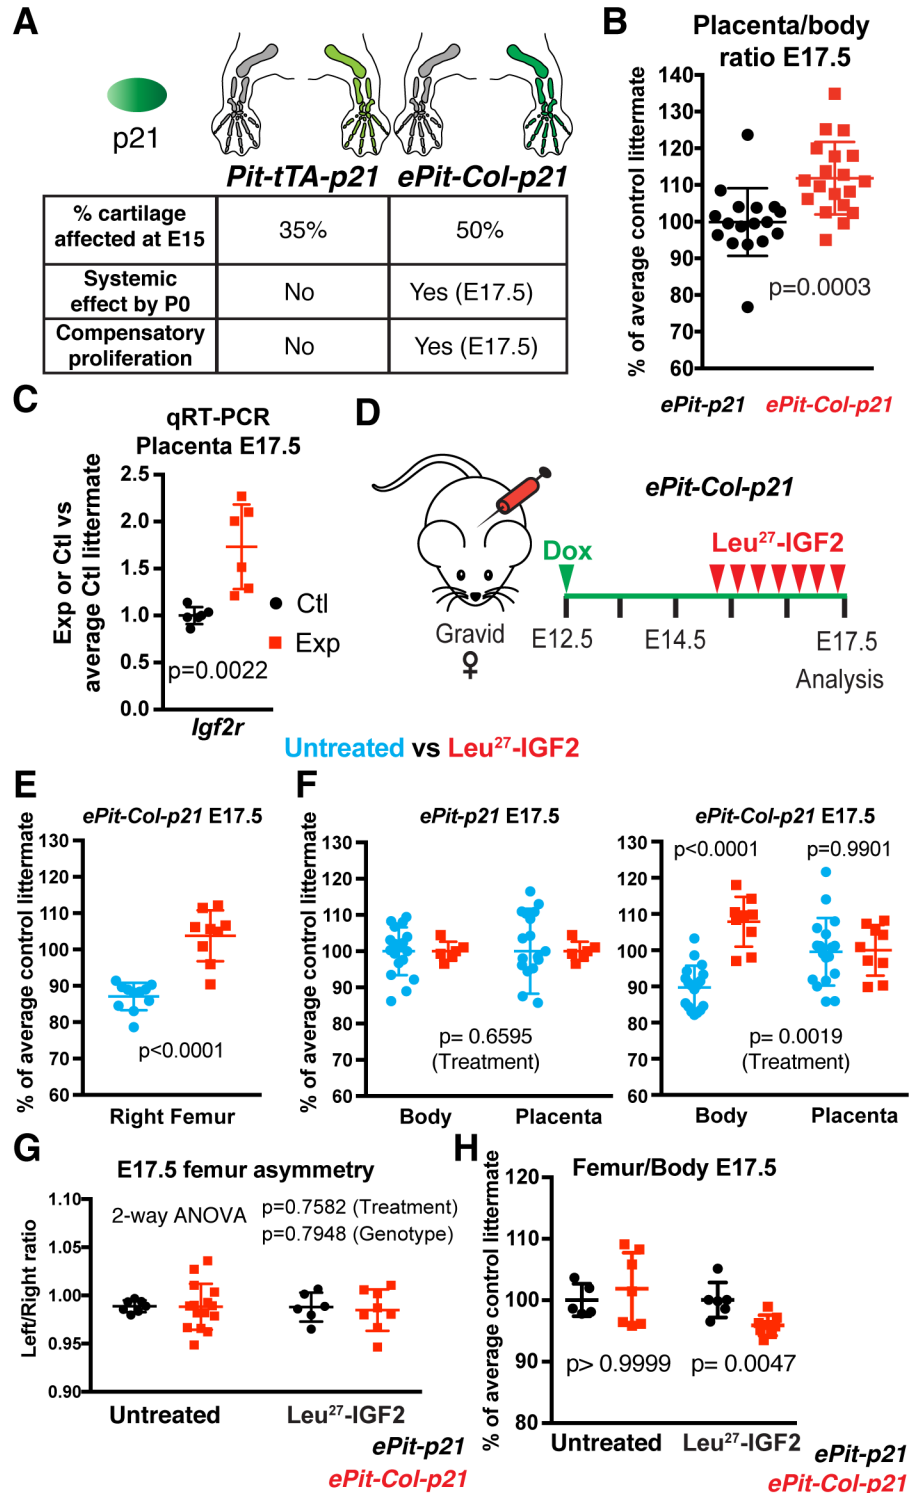

539

540 **Figure 5. The systemic growth reduction of *ePit-Col-p21* embryos involves impaired**

541 **placental function and is necessary to maintain limb/body proportions. (A) Summary of the**

542 **characteristics and outcomes of the different injury models. Colour gradients reflect the extent of**

543 insult. **(B)** Weight ratio of the *ePit-Col-p21* placenta (n=19) with respect to the body, normalised  
544 to the average of *ePit-p21* littermates (n=17) at E17.5, and compared by two-tailed unpaired  
545 Mann-Whitney test. **(C)** qRT-PCR for *Igf2r* (with *Tbp* as reference gene) in the placenta of E17.5  
546 *ePit-Col-p21* and *ePit-p21* embryos (n=6 each), normalised to the average value of control  
547 littermates. p-value for unpaired Mann-Whitney test is shown. **(D)** Pregnant females were treated  
548 with  $\text{Leu}^{27}$ -IGF2 to improve placental efficiency. **(E-F)** Characterization of the systemic growth  
549 reduction at E17.5 in  $\text{Leu}^{27}$ -IGF2-treated and untreated litters. For femur length, n=11 untreated  
550 and 9 treated *ePit-Col-p21* embryos. Unpaired two-tailed Mann-Whitney test was used. For body  
551 and placental weight, n=17 untreated and 6 treated *ePit-p21* embryos; 19 and 9 *ePit-Col-p21*  
552 embryos. 2-way ANOVA with Conceptus part and Treatment as variables was used. p-values for  
553 Treatment (bottom) and for Sidak's post-hoc tests (top) are shown. **(G)** Left/right ratio of femur  
554 length for E17.5 *ePit-p21* and *ePit-Col-p21* embryos from  $\text{Leu}^{27}$ -IGF2-treated (n=6 and 9) and  
555 untreated litters (n=4 and 11). p-values (2-way ANOVA) for Treatment and Genotype are  
556 shown. **(H)** Similar to (G), showing femur length/body weight ratio of E17.5 *ePit-p21* and *ePit-*  
557 *Col-p21* embryos, normalised to the average control littermate (n=5 and 7 untreated, 6 and 9  
558 treated). For each treatment, comparisons by unpaired Mann-Whitney test are shown.  
559

560  
561  
562  
563  
564  
565  
566  
567  
568  
569  
570  
571  
572  
573  
574

## Supplemental Information for

### **Cell-nonautonomous local and systemic responses to cell arrest enable long-bone catch-up growth in developing mice**

Alberto Roselló-Díez, Linda Madisen, Sébastien Bastide, Hongkui Zeng & Alexandra L. Joyner.

Correspondence to: [joynera@mskcc.org](mailto:joynera@mskcc.org), [roselloa@mskcc.org](mailto:roselloa@mskcc.org)

575 **Supplemental Table 1 (separate file)**

576 Normalised counts for deep-sequenced transcripts from left (L) and right (R) proliferative  
577 cartilage from three different E17.5 *ePit-Col-p21* embryos. The original numbering (#386-388)  
578 was changed to #1-3.

579 **Supplemental Table 2 (separate file)**

580 List of differentially expressed genes between left and right *ePit-Col-p21* cartilage at E17.5. The  
581 DESeq2 tool ( $\text{padj} \leq 0.05$ ) was used to obtain the list.  
582

583 **Supplemental Table 3 (separate file)**

584 Parameters of the statistical tests used in this study.

585 **Supplemental Table 4.**

586 Sequence of the oligonucleotides used for qRT-PCR  
587

| Primer name   | Sequence 5' → 3'       |
|---------------|------------------------|
| qPCR Cdkn1a F | CCTGGTGATGTCCGACCTG    |
| qPCR Cdkn1a R | CCATGAGCGCATCGCAATC    |
| qPCR Arc F    | AAGTGCCGAGCTGAGATGC    |
| qPCR Arc R    | CGACCTGTGCAACCCTTC     |
| qPCR Il17ra F | AGTGTTTCCTCTACCCAGCAC  |
| qPCR Il17ra R | GAAAACCGCCACCGCTTAC    |
| qPCR Gapdh F  | CCAATGTGTCCGTCGTGGATCT |
| qPCR Gapdh R  | GTTGAAGTCGCAGGAGACAACC |
| qPCR Igf2r F  | TGAATGGTGATCCTTGCCCTC  |
| qPCR Igf2r R  | CCGGTAGCTGTTGGTCTGTC   |
| qPCR Tbp F    | GGGAGAATCATGGACCAGAA   |
| qPCR Tbp R    | GATGGGAATCCAGGAGTCA    |

588

589 **Supplemental Figures and Legends**

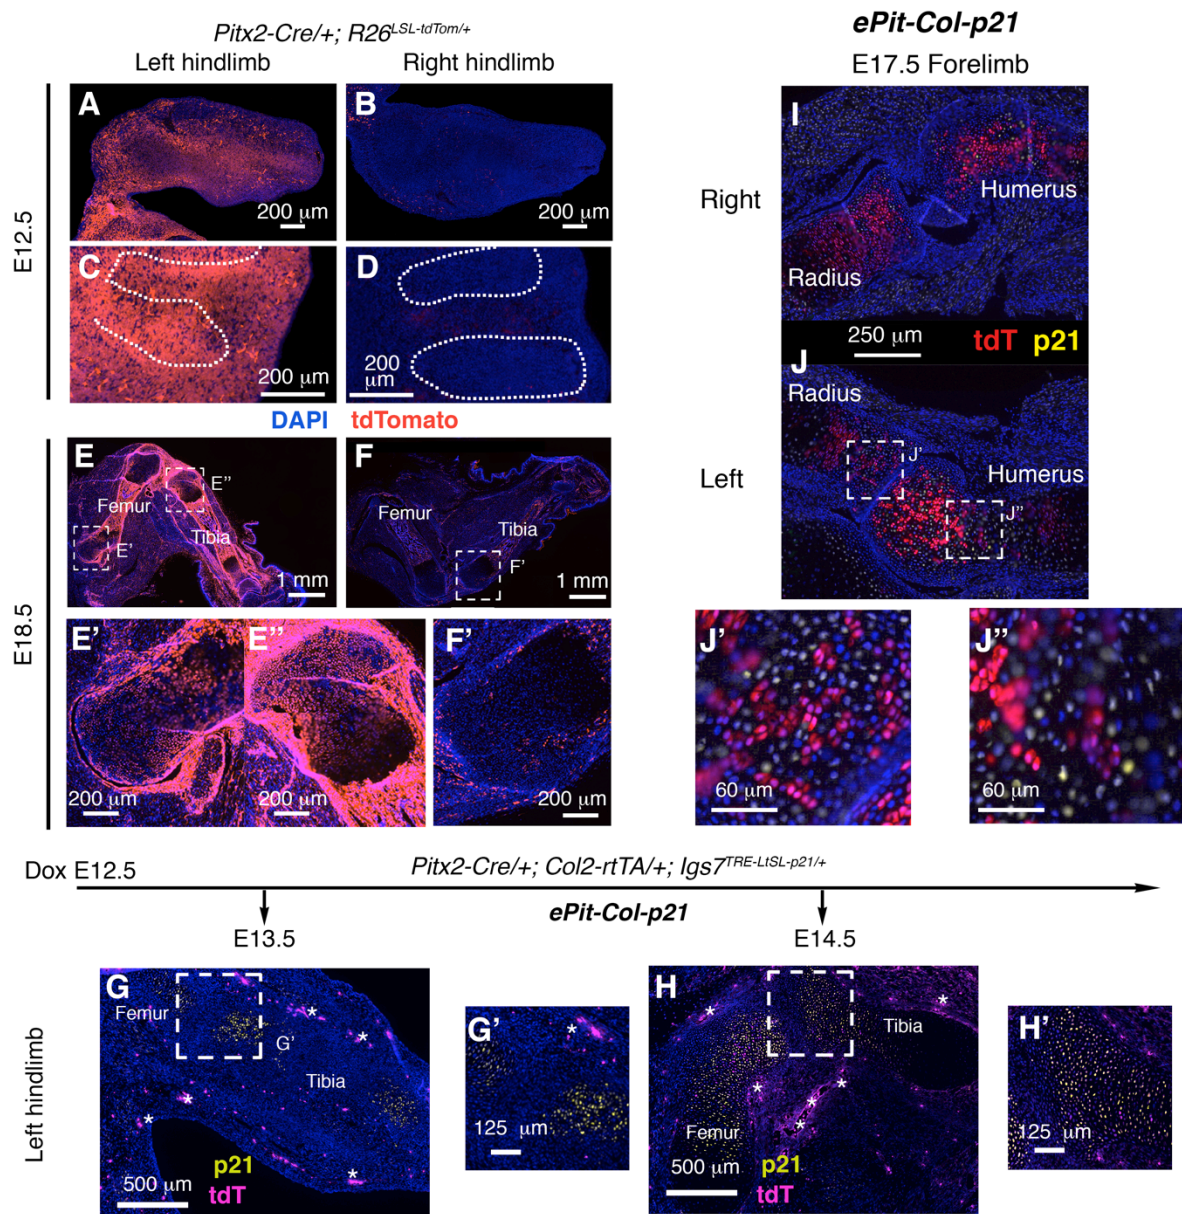

590

591 **Supplemental Figure 1. Characterization of the left limb-specific intersectional approach to**  
 592 **induce transient growth defects.** (A-F') *Pitx2-Cre* females were crossed with Ai9 males to  
 593 characterize the specificity of Cre-mediated labelling. 7- $\mu$ m sections from left and right  
 594 hindlimbs are shown at two different stages: E12.5 (A-D) and E18.5 (E-F') n = 4 for each stage.  
 595 Boxed regions in (E) and (F) are shown in (E'), (E'') and (F'). Most of the red signal on right



596 limbs corresponds to autofluorescent blood cells. (**G-H'**) Dynamics of tdTomato and CDKN1A  
597 (p21) activation in *ePit-Col-p21* embryos, one (G, G', n=2) and two days (H, H', n=3) after Dox  
598 administration to the pregnant female. Boxed regions in (G) and (H) are shown in (G'), and (H').  
599 Note that activation of the transgene starts to be detectable one day post Dox administration, but  
600 it is not complete until two days post-Dox. Asterisks = autofluorescent cells. Of note, the *Pitx2*-  
601 *Cre* allele is consistently left-predominant only when inherited from the female (not shown). (**I-**  
602 **J''**) Same as above, but E17.5 forelimb sections are shown.

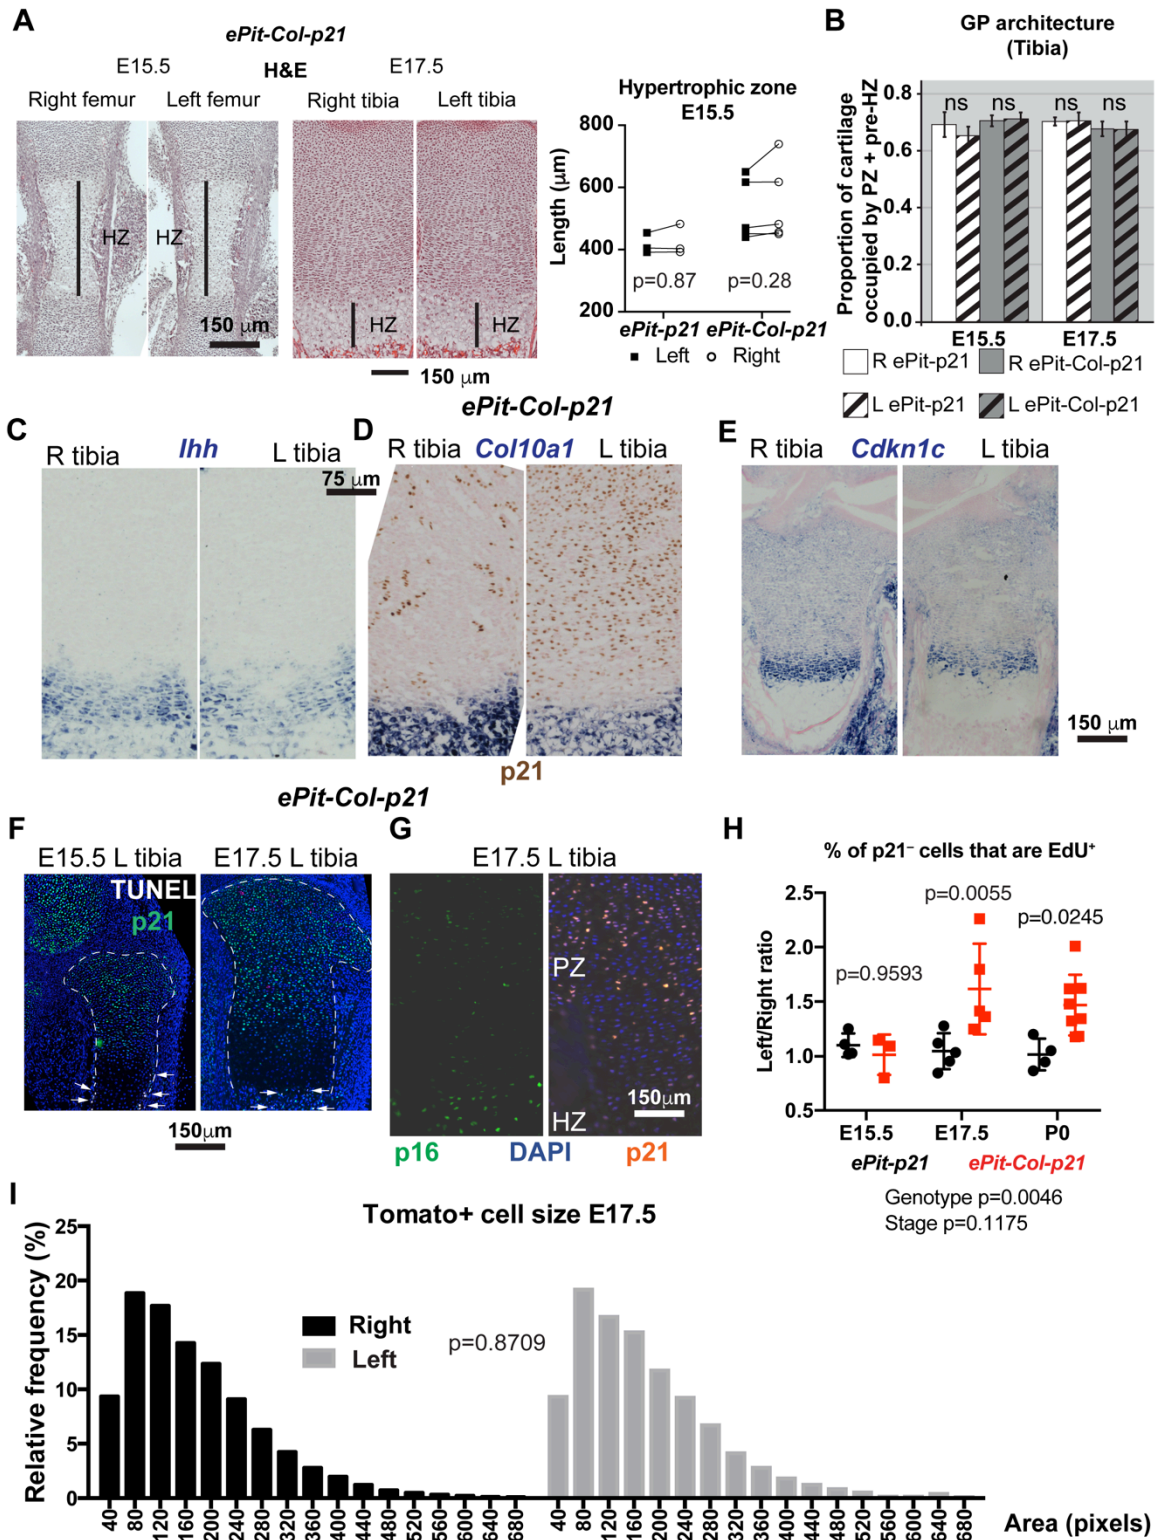

603

604 **Supplemental Figure 2. Histological, molecular and cellular characterization of the effects**

605 **of *p21* misexpression.** (A) Hematoxylin and eosin (H&E) staining of E15.5 femora and E17.5

606 proximal tibiae from *ePit-Col-p21* embryos and comparison of the length of the left and right  
607 hypertrophic zone (HZ) of the femora from *ePit-Col-p21* and *ePit-p21* embryos at E15.5 (2-way  
608 ANOVA with Genotype and Side as variables was used, and p-values are shown). **(B)** The  
609 stratification of the proximal tibial cartilage, expressed as the proportion of the total cartilage  
610 length represented by the sum of the proliferative zone (PZ) and pre-hypertrophic zones (pre-  
611 HZ), is not significantly different between left (L) and right (R) experimental and control  
612 embryos at E15.5 or E17.5 (n= 2 embryos for each genotype and stage). 2-way ANOVA with  
613 Genotype and Side as variables was used, and p-values for each stage are shown. **(C-E)** The  
614 expression of chondrocyte maturation markers *Cdkn1c*, *Col10a1* and *Ihh* is not ectopically  
615 triggered by p21 misexpression. **(F-G)** Misexpression of p21 does not lead to ectopic cell death  
616 in the experimental cartilage at E15.5 or E17.5 [(F), arrows, n=5) or cell senescence at E17.5  
617 [(G), monitored by p16 expression, n=2]. **(H)** Left/right ratios of EdU<sup>+</sup> incorporation in the PZ of  
618 *ePit-p21* and *ePit-Col-p21* embryos at E15.5 (n=4 and 3), E17.5 (n=5 and 5) and P0 (n=4 and 8).  
619 Comparison by 2-way ANOVA for Genotype and Stage (p-values below graphs). p-values for  
620 Sidak's posthoc test are shown on the graphs. **(I)** Cell size of WT (tdT<sup>+</sup>) chondrocytes was  
621 characterized for *ePit-Col-p21* embryos at E17.5 (n= 10). No significant difference between left  
622 and right distribution was found (p-value for two-tailed unpaired Mann-Whitney test for ranks is  
623 shown).

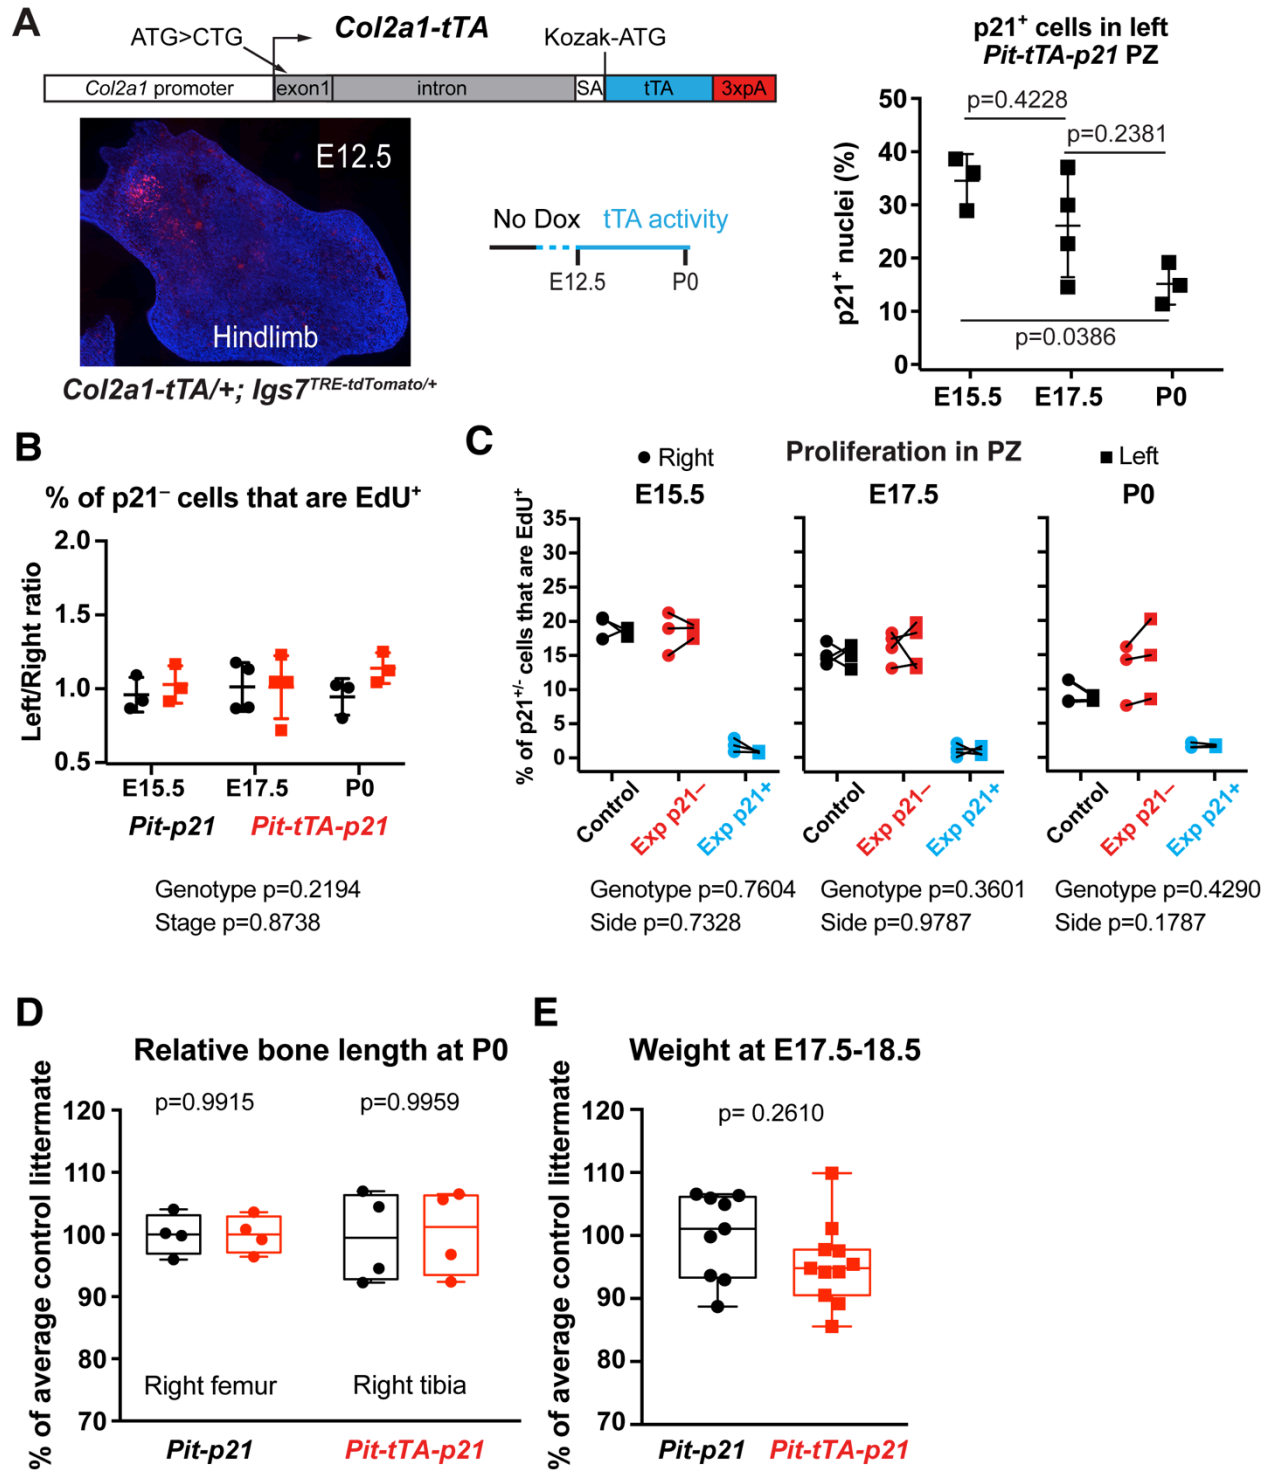

624

625 **Supplemental Figure 3. Compensatory proliferation and systemic growth reduction are not**

626 **detected by birth when *p21* is expressed in less than 35% of chondrocytes. (A) Top:**

627 **schematic of the new *Col2a1-tTA* allele. See ref. [30] for details on the *Col2a1* regulatory region**

628 used. In the absence of Dox, the tTA is activated around E12.5 (detected by a germline-  
629 recombined reporter *Ai62* allele)[17]. Right graph: % of p21<sup>+</sup> chondrocytes in the PZ of left and  
630 right proximal tibial GP of *Pit-tTA-p21* embryos unexposed to Dox, at E15.5, E17.5 and P0  
631 (n=3, 4 and 3). Comparison by one-way ANOVA (p=0.0368), followed by Tukey's posthoc tests  
632 (shown). **(B)** Left/Right ratio of EdU incorporation in PZ chondrocytes of *Pit-tTA* and *Pit-tTA-*  
633 *p21* mice at E15.5 (n=3 each), E17.5 (n=4 each) and P0 (n=3 and 3). Comparison by 2-way  
634 ANOVA for Genotype and Stage (p-values below graphs). **(C)** % of p21<sup>+</sup> or p21<sup>-</sup> chondrocytes  
635 that have EdU<sup>+</sup> nuclei in the proliferative zone (PZ) in the left and right tibiae of E17.5 *ePit-p21*  
636 (Control) and *ePit-Col-p21* (Exp) embryos. p21<sup>-</sup> cells from Control and Exp mice were  
637 compared by 2-way ANOVA with Side and Genotype as variables (p-values below graphs). n as  
638 in (B). **(D)** Length of P0 *Pit-p21* (n=4) and *Pit-tTA-p21* (n=4) right bones, normalised to the  
639 average value of control littermates. Comparisons were done by 2-way ANOVA with Genotype  
640 and Bone identity as variables, p(Genotype)= 0.9800, p-values for Sidak's posthoc test are  
641 shown. **(E)** Weight of pooled E17.5 and E18.5 *Pit-p21* (n=9) and *Pit-tTA-p21* (n=11) mice,  
642 normalised to the average value of control littermates, and compared by unpaired two-tailed  
643 Mann-Whitney test.

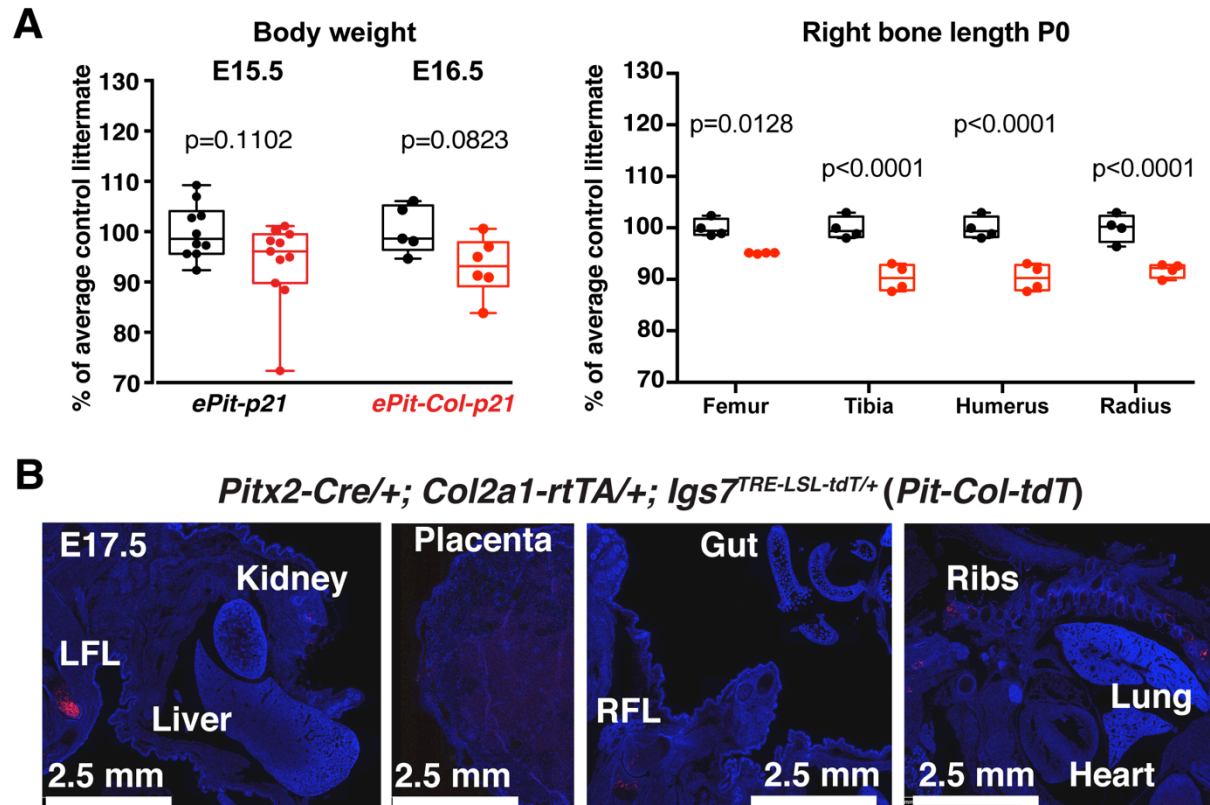

644

645 **Supplemental Figure 4. The systemic growth reduction triggered by transient and local p21**  
646 **misexpression is progressive and not due to leakiness in other organs. (A) Left panel: Weight**  
647 **of E15.5 and E16.5 *ePit-p21* (n=10 and 5) and *ePit-Col-p21* (n=11 and 6) embryos, normalised**  
648 **to the average control littermate, and compared by two-tailed unpaired Mann-Whitney test. Right**  
649 **panel: comparison of right bone length at P0. n=4 *ePit-p21* and 4 *ePit-Col-p21* pups.**  
650 **Comparison by 2-way ANOVA with Bone and Genotype as variables. For Genotype, p=0.0004.**  
651 **p-values for Sidak's posthoc test are shown. (B) Analysis of tdT expression in E17.5 *Pitx2-***  
652 ***Cre/+; Col2a1-rtTA/+; Igs7<sup>TRE-LSL-tdT/+</sup> embryos (*Pit-Col-tdT* model, Dox at E12.5) does not***  
653 **reveal spurious activation outside the left cartilage templates (n=2). LFL, RFL= left, right**  
654 **forelimb. The embryos were bisected sagittally to facilitate sectioning.**

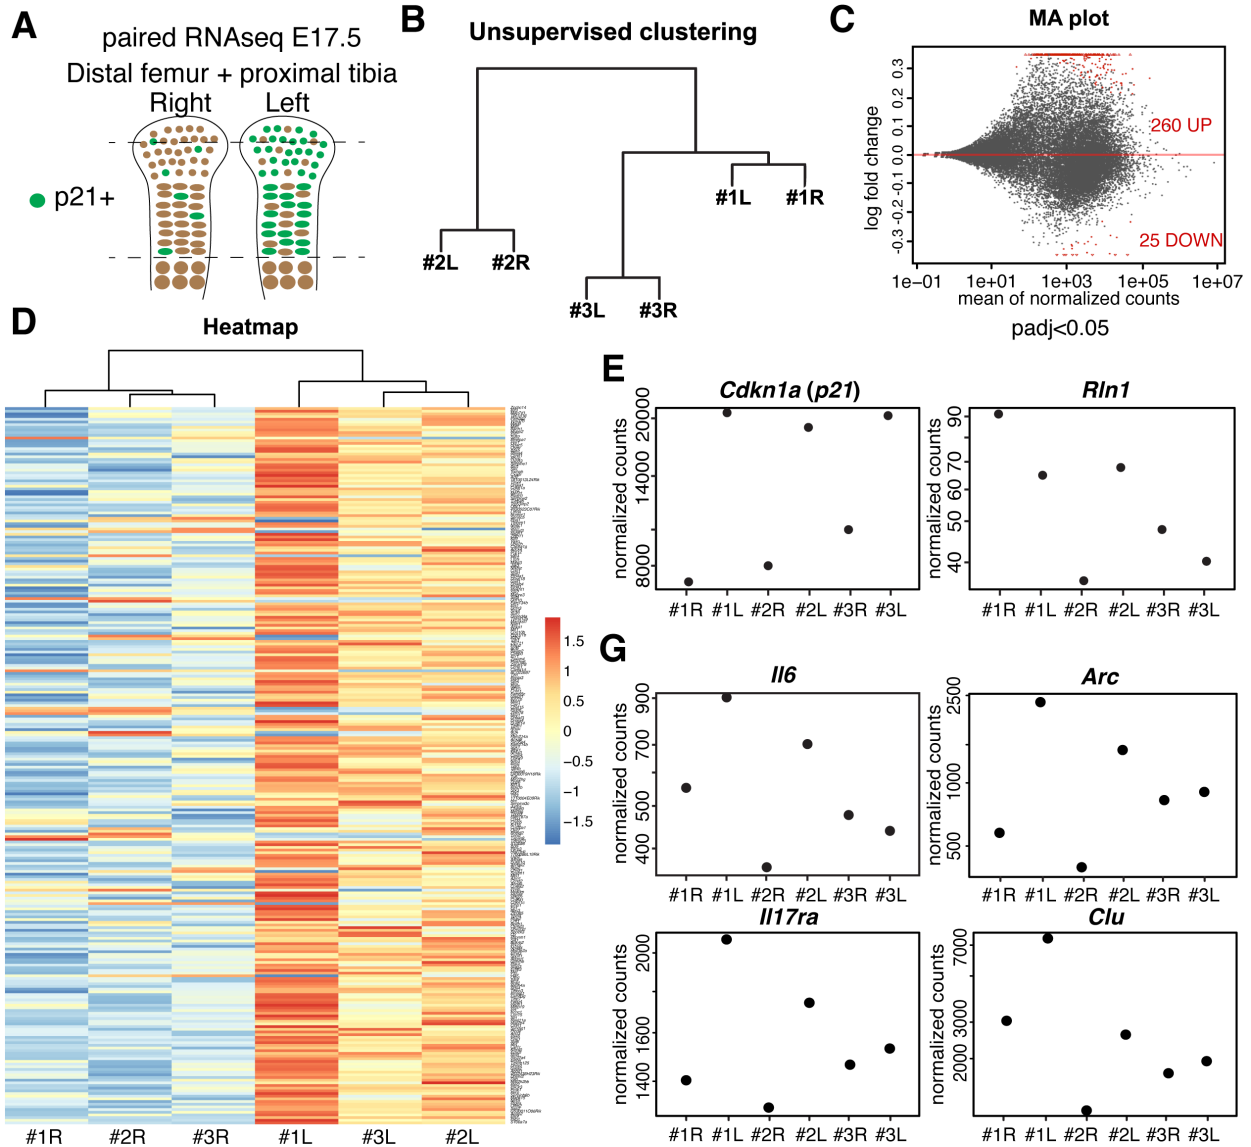

**F**

Overrepresentation  
Enrichment Analysis  
(WebGestalt)

| ID       | Name                                                                        | #Gene | FDR      |
|----------|-----------------------------------------------------------------------------|-------|----------|
| mmu04151 | PI3K-Akt signaling pathway - Mus musculus (mouse)                           | 19    | 6.81E-05 |
| mmu04115 | p53 signaling pathway - Mus musculus (mouse)                                | 9     | 1.08E-04 |
| mmu05206 | MicroRNAs in cancer - Mus musculus (mouse)                                  | 11    | 6.95E-04 |
| mmu04630 | Jak-STAT signaling pathway - Mus musculus (mouse)                           | 11    | 1.37E-03 |
| mmu05203 | Viral carcinogenesis - Mus musculus (mouse)                                 | 12    | 2.14E-03 |
| mmu04510 | Focal adhesion - Mus musculus (mouse)                                       | 11    | 3.74E-03 |
| mmu05202 | Transcriptional misregulation in cancer - Mus musculus (mouse)              | 10    | 5.14E-03 |
| mmu04068 | FoxO signaling pathway - Mus musculus (mouse)                               | 9     | 5.14E-03 |
| mmu04933 | AGE-RAGE signaling pathway in diabetic complications - Mus musculus (mouse) | 7     | 2.19E-02 |
| mmu05162 | Measles - Mus musculus (mouse)                                              | 8     | 2.41E-02 |
| mmu05161 | Hepatitis B - Mus musculus (mouse)                                          | 8     | 3.62E-02 |
| mmu04921 | Oxytocin signaling pathway - Mus musculus (mouse)                           | 8     | 3.65E-02 |

656 **Supplemental Figure 5. Transcriptomic comparison of left and right *ePit-Col-p21* cartilage.**

657 **(A)** Schematic of the experimental approach. After dissection and perichondrium (blue layer)  
658 removal, left and right cartilage elements were deprived of condyles and hypertrophic zone, and  
659 flash frozen. Left and right samples from each embryo were kept separated and RNA was  
660 extracted for deep sequencing. **(B)** Unsupervised hierarchical clustering of 6 samples (left and  
661 right cartilage from 3 embryos). Note that each sample is closest to its contralateral one. **(C-D)**  
662 MA plot (C) and clustered heatmap (D) of the 285 differentially expressed genes [red dots in  
663 (C)] obtained by a paired DESeq2 design with adjusted p-value  $\leq 0.05$ . **(E)** Normalised counts  
664 for *Cdkn1a* (*p21*) and *Rln1* (*Relaxin1*, the closest vertebrate homologue to *dilp8*) are shown for  
665 each sample. Note that *Rln1* is virtually absent from control and experimental cartilage. See also  
666 Supplemental Tables 1 and 2. **(F)** Overrepresented pathways obtained from the 285 differentially  
667 expressed genes (FDR<0.05). Note the presence of immune response pathways. **(G)** Normalised  
668 counts for the transcripts following a similar left-right pattern as *Cdkn1a*. The four examples  
669 shown are involved in cellular stress response[38-41].

670



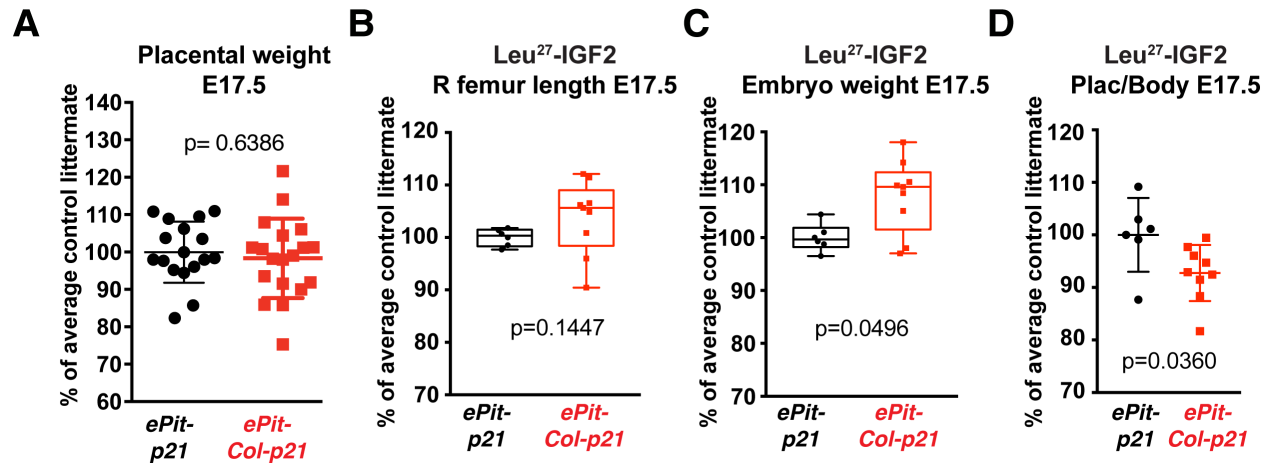

671

672 **Supplemental Figure 6. Reduced placental function underlies the systemic growth**

673 **reduction in *ePit-Col-p21* embryos.** (A) Placental weight for E17.5 *ePit-p21* (n=17) and *ePit-*

674 *Col-p21* embryos (n=18), normalised to the average of *ePit-p21* littermates, and compared by

675 two-tailed unpaired Mann-Whitney test. (B-D) Comparison of the indicated body measurements

676 at E17.5 between *ePit-p21* (n=6) and *ePit-Col-p21* embryos (n=9) from Leu<sup>27</sup>-IGF2-treated

677 litters. Unpaired two-tailed Mann-Whitney test was used in all cases.

## Adaptive growth triggered by local insults

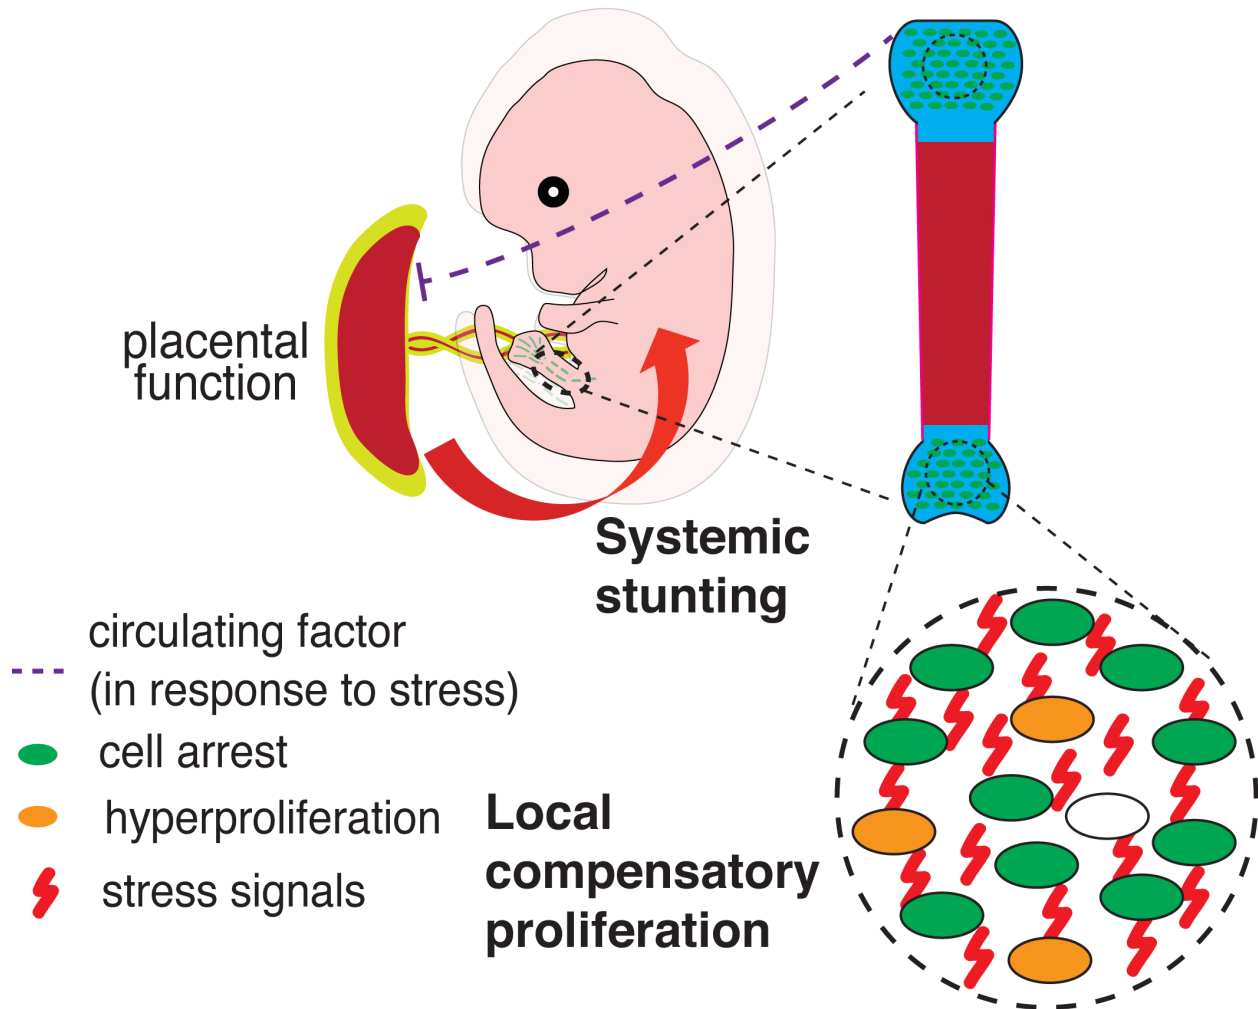

678

679 **Supplemental Figure 7. Model for adaptive growth after unilateral mosaic growth**

680 **inhibition in long bone chondrocytes.** Both local (compensatory proliferation) and systemic

681 responses (reduced placental function) are triggered following expression of p21 in more than

682 35% of the growth plate chondrocytes in the left hindlimb.
